# **A Comprehensive Assessment of the Genetic Determinants in *Salmonella* Typhimurium for Resistance to Hydrogen Peroxide**

Sardar Karash<sup>1</sup>, Rohana Liyanage<sup>2,3</sup>, Abdullah Qassab<sup>1</sup>, Jackson O. Lay, Jr.<sup>2,3</sup>, and  
Young Min Kwon<sup>1,4\*</sup>

<sup>1</sup>Cell and Molecular Biology Program, University of Arkansas, Fayetteville, AR 72701,

<sup>2</sup>Department of Chemistry, University of Arkansas, Fayetteville, AR 72701,

<sup>3</sup>Statewide Mass Spectrometry Facility, Fayetteville, AR 72701, and

<sup>4</sup>Department of Poultry Science, University of Arkansas, Fayetteville, AR 72701

\*Corresponding author:

Department of Poultry Science  
College of Agricultural, Food and Life Sciences  
University of Arkansas  
Fayetteville, AR 72701  
Phone : (479) 575-4935  
Email [ykwon@uark.edu](mailto:ykwon@uark.edu)

## ABSTRACT

*Salmonella* is a Gram-negative bacterium that infects a wide range of hosts. *Salmonella* Typhimurium causes gastroenteritis in human, and can survive and replicate in macrophages. An essential mechanism used by the macrophages to eradicate *Salmonella* is production of reactive oxygen species. Here, we used proteogenomic approaches to determine the candidate genes and proteins that have a role in resistance of *S. Typhimurium* to H<sub>2</sub>O<sub>2</sub>. For Tn-seq, a highly saturated Tn5 insertion library was grown *in vitro* in Luria-Bertani broth (LB) medium as well as LB containing either 2.5 (H<sub>2</sub>O<sub>2</sub>L) or 3.5 mM H<sub>2</sub>O<sub>2</sub> (H<sub>2</sub>O<sub>2</sub>H). We identified two sets of overlapping genes that are required for resistance of *S. Typhimurium* to H<sub>2</sub>O<sub>2</sub>L and H<sub>2</sub>O<sub>2</sub>H, and the result was validated via phenotypic evaluation of 50 selected mutants. The enriched pathways for resistance to H<sub>2</sub>O<sub>2</sub> included DNA repair, aromatic amino acid biosynthesis, Fe-S cluster biosynthesis, iron homeostasis, flagellar genes, H<sub>2</sub>O<sub>2</sub> scavenging enzymes, and DNA adenine methylase. Particularly, we identified aromatic amino acid biosynthesis (*aroB*, and *aroK*) and putative iron transporter system (*ybbK*, *ybbL*, and *ybbM*) as novel mechanisms for resistance to H<sub>2</sub>O<sub>2</sub>. The proteomics revealed that the majority of essential proteins, including ribosomal proteins, were downregulated upon exposure to H<sub>2</sub>O<sub>2</sub>. A subset of the proteins identified by Tn-seq were analyzed by targeted proteomics, and 70 % of them were upregulated upon exposure to H<sub>2</sub>O<sub>2</sub>. The identified candidate genes will deepen our understanding on the mechanisms of *S. Typhimurium* survival in macrophages, and can be exploited to develop new antimicrobial drugs.

## IMPORTANCE

*Salmonella* infection is frequently caused by consumption of contaminated food or water. The infection may lead to gastroenteritis or typhoid fever, depending on the *Salmonella* serovars. Even though the bacterium encounters the immune defense arsenals of the infected host, including reactive oxygen species in phagocytes, the bacterium can survive and replicate. In this study, proteogenomic approaches were used in order to identify the genes and proteins that have a role in resistance to H<sub>2</sub>O<sub>2</sub>. In addition to the H<sub>2</sub>O<sub>2</sub> scavenging and degrading enzymes, aromatic amino acid biosynthesis and iron homeostasis were identified among the most important pathways for H<sub>2</sub>O<sub>2</sub> resistance. These findings will deepen our knowledge on the mechanisms of *Salmonella* survival in phagocytes and other niches with oxidative stress, and also provides novel targets to develop new antimicrobial therapeutics.

## Introduction

*Salmonella* is a Gram-negative bacterium that infects humans and animals. *Salmonella enterica* has numerous serovars, which include typhoidal and non-typhoidal strains. In contrast to the typhoidal salmonellae which are human restricted pathogens, the non-typhoidal salmonellae (NTS), serovar Enteritidis and Typhimurium, are able to infect a wide range of hosts, causing gastroenteritis (1). The NTS strains, including *Salmonella enterica* serovar Typhimurium, account for 11% (1.2 million cases) of the total foodborne illnesses caused by different pathogens in the United States (2). It has been estimated that *Salmonella* is responsible for 93.8 million cases of gastroenteritis, leading to 155,000 deaths worldwide annually (3). The pathogen remains a continuous threat to the food safety, and public health.

To initiate an infection and survive inside the host, *Salmonella* needs to overcome a myriad of host defense mechanisms. As *Salmonella* reaches the intestine and breaches the epithelial tissue, it enters the macrophages and activates different virulence strategies in order to survive and replicate in them (4). An essential mechanism used by the phagocytes to kill and eradicate *Salmonella* is production of reactive oxygen species (ROS). Hydrogen peroxide ( $H_2O_2$ ), superoxide anion ( $O_2^{\cdot-}$ ), and the hydroxyl radical ( $HO^{\cdot}$ ) are derivatives of ROS. The short-lived  $O_2^{\cdot-}$ , produced by the NADPH-dependent phagocytic oxidase, quickly dismutates into  $H_2O_2$ , which diffuses across semipermeable bacterial cell membranes. Eventually,  $H_2O_2$  reduces to  $HO^{\cdot}$  by  $Fe^{2+}$  via Fenton reaction (5-7). The ROS, including  $H_2O_2$ , can damage DNA, iron-sulfur cluster-containing proteins, and other biological molecules in the bacterial cells (8-10).

Numerous genetic factors and proteins that are important for resistance of *S. Typhimurium* to  $H_2O_2$  have been discovered and the underlying mechanisms have been explored (11,12). Various approaches and techniques have been employed to study global response of *Salmonella* or related

bacteria to H<sub>2</sub>O<sub>2</sub> *in vitro* as a model system to simulate the bacterium's response to ROS in phagocytic cells: (i) Two-dimensional gel electrophoresis identified H<sub>2</sub>O<sub>2</sub>-induced proteins in *Salmonella* (13), (ii) DNA microarray identified H<sub>2</sub>O<sub>2</sub> induced genes in *E. coli* (14), and (iii) RNA-seq identified H<sub>2</sub>O<sub>2</sub> induced genes in *Salmonella* (15). However, the factors required for fitness under the given condition cannot be identified with high confidence based on the analysis of transcriptomics or proteomics data (16). Microarray-based tracking of random transposon insertions was used to identify numerous genes in *Salmonella* that are required for survival in mice and macrophages (17-18). However, the genetic factors responsible for resistance to ROS cannot be sorted out among all of the genetic factors identified in the study that are required for fitness in the presence of multiple host stressors.

To shed more insights into the underlying mechanisms of *Salmonella* resistance to H<sub>2</sub>O<sub>2</sub>, more direct approach linking the gene-phenotype relationships in a genome-wide scale would be necessary. Tn-seq is a powerful approach to allow direct and accurate assessment of the fitness requirement of each gene on the entire genome of a prokaryotic organism (19). In Tn-seq method, a saturated transposon insertion library (input) is exposed to a selective condition, and the mutant population altered through the selection (output) is recovered. Then, the genomic junctions of the transposon insertions are specifically amplified and sequenced from both input and output pools by high-throughput sequencing. The gene fitness can be obtained by calculating the change in relative abundance of the sequence reads corresponding to each gene in the entire genome between the two pools. Tn-seq has been employed to assign gene functions to *Salmonella* genomes in numerous studies: (i) Previously, our lab identified conditionally essential genes that are required for growth in the presence of bile, limited nutrients, and high temperature (20), (ii) The genes required for intestinal colonization were identified in chickens, pigs, and cattle (21), (iii) Candidate

essential genes and genes contributing toward bile resistance were identified (22), (iv) Core conserved genes for growth in rich media were identified in serovars Typhi and Typhimurium (23). In addition to Tn-seq, electrospray ionization liquid chromatography tandem mass spectrometry (ESI-LC-MS/MS) is a powerful approach in identifying and quantifying proteins in a large scale. The system-wide protein regulation can be determined using mass spectrometry signal intensities of tryptic peptides obtained from two different culture conditions (24). The post-translational modification in proteins can be revealed by using proteomic analysis (25). Many studies took advantage of proteomic analysis of *Salmonella*. However, to the best of our knowledge, this study is the first to investigate proteogenomics of a bacterium by combining Tn-seq and proteome analysis simultaneously to the same stressor.

In this work, we used Tn-seq method and proteomic analysis in combination to determine system-wide responses of *S. Typhimurium* to two different concentrations of H<sub>2</sub>O<sub>2</sub> (H<sub>2</sub>O<sub>2</sub>L and H<sub>2</sub>O<sub>2</sub>H). We obtained a comprehensive list of 137 genes that are putatively required for the resistance of *S. Typhimurium* 14028 to H<sub>2</sub>O<sub>2</sub>. The role of 50 selected genes in resistance to H<sub>2</sub>O<sub>2</sub> were determined by phenotypic evaluation of the individual deletion mutants. Also, we identified a set of 246 proteins that are differentially expressed in response to H<sub>2</sub>O<sub>2</sub>, using data-dependent acquisition (DDA) proteomics, which are largely overlapped with the genes identified by Tn-seq; targeted proteomics showed 70% of the proteins identified by Tn-seq were upregulated by H<sub>2</sub>O<sub>2</sub>. In addition to the genes of *S. Typhimurium* previously known to be important for resistance to H<sub>2</sub>O<sub>2</sub>, we identified approximately 80 genes that have not been previously associated with resistance to oxidative stress. The result of this study highlighted that the genes in aromatic amino acid biosynthesis, *aroB* and *aroK*, and iron homeostasis, *ybbK*, *ybbL*, and *ybbM*, are crucially important for growth fitness under H<sub>2</sub>O<sub>2</sub> stress. The identified candidate genes will expand our understanding

on the molecular mechanisms of *Salmonella* survival in macrophages, and serve as new antimicrobial drug targets.

## Results and Discussion

### The H<sub>2</sub>O<sub>2</sub> concentrations and the selections of Tn5 library

First, we sought to determine the growth response of the wild type *S. Typhimurium* 14028 cells in LB media containing varying concentrations of H<sub>2</sub>O<sub>2</sub>. The wild type cells were grown in LB media that contain different concentrations of H<sub>2</sub>O<sub>2</sub> in 96-well plates. After evaluating the growth rates for the cultures, 2.5 and 3.5 mM H<sub>2</sub>O<sub>2</sub> were chosen for Tn-seq selections in our study, and termed H<sub>2</sub>O<sub>2</sub>L and H<sub>2</sub>O<sub>2</sub>H, respectively. In comparison to *Salmonella* grown in LB media with no H<sub>2</sub>O<sub>2</sub>, H<sub>2</sub>O<sub>2</sub>L and H<sub>2</sub>O<sub>2</sub>H reduced the growth rates by 10% and 28%, respectively (Fig. 1A). The lag time increased by a 5.7-fold (0.5 vs. 2.9 hr), and an 11-fold (0.5 vs. 5.6 hr) in H<sub>2</sub>O<sub>2</sub>L and H<sub>2</sub>O<sub>2</sub>H, respectively. The maximum OD<sub>600</sub> decreased by only 1% for the H<sub>2</sub>O<sub>2</sub>L and 2% for the H<sub>2</sub>O<sub>2</sub>H in comparison to LB media (Fig. 1A).

For the selection of Tn5 library, 20 ml cultures in 300 ml Erlenmeyer flasks containing LB, H<sub>2</sub>O<sub>2</sub>L, or H<sub>2</sub>O<sub>2</sub>H were inoculated with the same Tn5 library at the seeding CFUs of the library at  $3.5 \times 10^6$ . This seeding level provided ~10 CFUs for each Tn5 insertion mutant in the library. The cultures were grown until the mid-exponential phase, in which the CFUs reached  $1.17 \times 10^8$  (SE  $0.01 \times 10^8$ ). It required 7.5 and 9.2 h to reach the cell density as measured by optical density for H<sub>2</sub>O<sub>2</sub>L and H<sub>2</sub>O<sub>2</sub>H, respectively, in contrast to 5 h for LB medium (Fig. 1B). We observed some differences in growth responses between the cultures in a 96-well plate and in a 300-ml Erlenmeyer flask. The optical density readings by the plate reader was different in comparison to those by Bio-photometer that we used to measure optical density of the culture in the flask. As a result, the growth curve in

Fig.1.A which was based on 96-well plate reader, dose not match exactly with the time required for the Tn5 library to reach the target mid-exponential phase in the flask cultures. In addition, we observed that the H<sub>2</sub>O<sub>2</sub> is stable in LB media free of *Salmonella* during the window of time used for the library selection process (Fig.S1), which was also supported by Bogomolnaya et al. (26).

### **Preparation of Tn5-seq amplicon library**

The *Salmonella* mutants were generated by using the delivery plasmid pBAM1 via conjugation. A total of 325,000 mutant colonies were recovered from 50 plates. Each mutant contained a single random insertion of Tn5 transposon in the chromosome or plasmid according to DNA sequencing of Tn5-junction sequences for a small set (n = 71) of randomly selected Tn5 mutants. We found a significant portion (~20%) of the mutants in the library that were not genuine Tn5 insertions, but the mutants generated as a result of pBAM1 integration into chromosome as determined by their ability to grow in the presence of ampicillin. To prevent the Illumina sequencing reads from being wasted on sequencing Tn5 junctions from these cointegrants, we digested genomic DNA of the input and output libraries with PvuII, which digests immediately outside the inverted repeats on both sides of Tn5. The digested DNA was then used to prepare Tn-seq amplicon library as described in Materials and Methods. Our Tn-seq data analysis indicated that our strategy of removing the DNA sequences originating from cointegrants was effective because only 0.55% of the total HiSeq reads corresponding to Tn5-junctions matched to pBAM1. It should be possible to remove them completely by ensuring complete digestion of genomic DNA with PvuII. The method for Tn-seq amplicon library we developed and used in this study has multiple advantages over other Tn-seq protocols, because our method requires only 100 ng of the genomic DNA, and the whole process can be completed in a day (27). When the extension step in the protocol was performed using a conventional 20 nucleotide primer, and the final products of exponential PCR



were separated on agarose gel electrophoresis, even the negative controls (the wild type genomic DNA or mutant library genomic DNA without linear extension) showed smear patterns of nonspecific background amplification. However, when dual priming oligonucleotide (DPO) primer was used in place of the conventional primer for linear extension, non-specific background amplification was completely disappeared. Therefore, we adopted the DPO primer in linear extension step for all library samples in this study. Then, the single-stranded extension products were C-tailed, and used as templates for the exponential PCR step using nested primer specific to Tn5 and poly G primer that contain Illumina adapter sequences along with sample index sequences (Fig. S2). The final PCR products were separated on an agarose gel, and the fragments within the range of 325-625 bp were gel-purified. After pooling of multiple samples, the combined library was sequenced on a HiSeq 3000.

### **Summary of Tn-seq DNA analysis**

After de-multiplexing and C-tail trimming of all sequence reads, ~72 million reads of Tn5-junctions with mean read length of 94 bp were obtained. The number of the reads mapped to the complete genome of *S. Typhimurium* 14028 were ~25, 15, and 19 million for LB, H<sub>2</sub>O<sub>2</sub>L, and H<sub>2</sub>O<sub>2</sub>H, respectively. The number of unique insertions on the chromosome were 125,449 in the input library, excluding the plasmid (Table S1). On average, Tn5 was inserted in every 39 bp. Number of raw reads per open reading frame (ORF) for H<sub>2</sub>O<sub>2</sub>L was plotted over the corresponding number of H<sub>2</sub>O<sub>2</sub>H, which yielded an  $R^2$  of 0.91, indicating the mutants in the input library quantitatively responded in a similar way for both H<sub>2</sub>O<sub>2</sub>L and H<sub>2</sub>O<sub>2</sub>H as expected (Fig. S3). The insertions were mapped to 5,428 genes or 8,022 genes/intergenic regions. Interestingly, the ORF STM14\_5121, which is 16.7 kbp long, had the highest number of insertions (~700 insertions) and reads (0.25 M).

## Comparison of various bioinformatics pipelines for Tn-seq data analysis

We used 3 different Tn-seq analysis tools to identify the genes and compare the results across the methods with the goal of comprehensive identification of “all” genes required for resistance to H<sub>2</sub>O<sub>2</sub>. The first tool, ARTIST (28), created small non-overlapping genomic windows of 100 bp and the reads from each window were arbitrarily assigned into the middle of the window. The default normalization script of the tool was used. Then, the relative proportions of insertion sites in the output library versus the input were tabulated. Mann-Whiney *U* (MWU) test was used to assess the essentiality of the locus. To consider a gene/intergenic region conditionally essential for growth in the presence of H<sub>2</sub>O<sub>2</sub>, *p* value had to be  $\leq 0.05$  in 90 of the 100 conducted MWU tests. Subsequently, 20 genes and 1 intergenic region were identified for H<sub>2</sub>O<sub>2</sub>L and 4 genes for H<sub>2</sub>O<sub>2</sub>H (Data Set S1). We speculate the reason that more genes were identified for H<sub>2</sub>O<sub>2</sub>L in comparison to H<sub>2</sub>O<sub>2</sub>H, was partially due to the lower number of total reads of H<sub>2</sub>O<sub>2</sub>L as compared to H<sub>2</sub>O<sub>2</sub>H, even though the read numbers of H<sub>2</sub>O<sub>2</sub>L was normalized to those of the input.

The second tool, Tn-seq Explorer (29), counted insertions in overlapping windows of a fixed size. Using a 550 bp window size, each annotated gene was assigned an essentiality index (EI) which is determined mainly based on the insertion count in a window in this gene. The bimodal distribution of insertion counts per window divided the essential genes to the left and the non-essential genes to the right. To find conditional essential genes, the EI of the output was subtracted from the EI of the input. The genes with negative  $\Delta EI$  were ranked based on the change in read fold change ( $\text{Log}_2(\text{H}_2\text{O}_2\text{L or H}_2\text{O}_2\text{H}/\text{Input})$ ). We found 114 consensus genes between H<sub>2</sub>O<sub>2</sub>L and H<sub>2</sub>O<sub>2</sub>H that had at least four-fold reduction in H<sub>2</sub>O<sub>2</sub>H read counts as compared to the input. The four-fold reduction ( $\text{Log}_2\text{FC} = -2$ ) threshold was chosen based on our validation study of Tn-seq data by single mutant assays (Data Set S1).

The third tool, TRANSIT (30), determined read counts of genes in the input and output library. The differences of total read counts between the input and outputs were obtained. The insertion sites were permuted for a number that is specified by the user (we used 10,000 sample). This sampling for each gene gave difference in read counts. The  $p$  value was calculated from the null distribution of the difference in read counts. We identified 8 and 21 genes for the H<sub>2</sub>O<sub>2</sub>L and H<sub>2</sub>O<sub>2</sub>H, respectively, using a  $p$  value  $\leq 0.05$  (Data Set S1). For normalization, trimmed total reads (TTR) was chosen for this study.

The combined list of the genes identified by the 3 Tn-seq analysis tools for both H<sub>2</sub>O<sub>2</sub>L and H<sub>2</sub>O<sub>2</sub>H included 137 genes (Data Set S1). All of the genes on this list are expected to have a role in conferring resistance to H<sub>2</sub>O<sub>2</sub> and allow *Salmonella* to survive and replicate in the presence of H<sub>2</sub>O<sub>2</sub> *in vitro*. Of the 21 genes identified by TRANSIT, 19 of these genes were also identified by Tn-seq Explorer, but only 3 out of this 21 were identified by ARTIST. The 19 genes were *hscA*, *rbsR*, *fepD*, *efp*, *oxyR*, *polA*, *ybaD*, *aroD*, *ruvA*, *xthA*, *dps*, *aroB*, *uvrD*, *tonB*, *uvrA*, *aroK*, *ybbM*, *lon*, and *proC*. Two genes, *fepD* and *xthA*, were identified by the all 3 methods and for both conditions.

The 3 Tn-seq analysis tools are very valuable for Tn5 data analysis, but each tool has its own advantages and disadvantages. For ARTIST, (i) the user must know how to run scripts in Matlab software, (ii) the analysis is very slow on a personal computer with the HiSeq data, (iii) it has only one method for normalization, but (iv) it can search for essentiality in the intergenic regions. For Tn-seq Explorer, (i) there is no data normalization, and (ii) prediction on small genes is prone to be inaccurate, but (iii) its very user-friendly and runs fast. For TRANSIT, (i) the user should have some knowledge on running scripts on terminal, (ii) it may need some modification in its Python script according to the way the library was prepared for sequencing, and (iii) a few software

packages should be installed on the computer as TRANSIT pre-requisites, but (iv) it does have 6 different methods for data normalization and it runs very fast on a personal computer. Although ARTIST and Tn-seq Explorer are very useful tools for Tn-seq data analysis, we prefer using TRANSIT in our future data analysis for conditionally essential genes. In the following sections, we continued the downstream analysis mainly based on the 137 genes that include all of the genes identified by all 3 methods.

### **The enriched pathways for resistance to H<sub>2</sub>O<sub>2</sub>**

In order to categorize the identified genes that are required for *Salmonella* resistance to the H<sub>2</sub>O<sub>2</sub>, the 137 genes were subjected to pathway enrichment analysis using DAVID Bioinformatics Resources 6.7, NIAID/NIH (31). A total of 15 KEGG pathways (32) were recognized for 69 genes on the list. The enriched pathways include homologous recombination (*ruvC*, *polA*, *ruvA*, *ruvB*, *priB*, *recA*, *recR*, *holC*, *holD*, *recC*, *recG*), nucleotide excision repair (*uvrD*, *polA*, *uvrA*, *uvrC*), mismatch repair (*dam*, *uvrD*, *holC*, *holD*), RNA degradation (*pnp*, *hfq*, *ygdP*), purine and pyrimidine metabolism (*apaH*, *polA*, *pnp*, *arcC*, *spoT*, *holC*, *holD*, *cmk*, *dcd*, *pnp*), phenylalanine, tyrosine and tryptophan biosynthesis (*aroD*, *aroB*, *aroA*, *aroK*, *aroE\_2*), arginine and proline metabolism (*proC*, *arcC*, *arcA*), starch and sucrose metabolism (*otsA*, *crr*, *pgm*), glycolysis and gluconeogenesis (*crr*, *aceE*, *pgm*, *tpiA*), oxidative phosphorylation (*atpG*, *atpA*, *cydA*), DNA replication (*polA*, *holC*, *holD*), flagellar assembly (*fliJ*, *fliD*, *flhD*, *fliC*), ABC transporter (*sapC*, *yejE*, *yjgP*, *fepC*, *fepD*, *cbiM*, *cysP*), and two component system (*rscB*, *rscA*, *fliC*, *arcA*, *arcB*, *phoR*, *barA*, *flhD*). Since KEGG was not able to recognize many genes on the list, we used SP\_PIR\_Keywords of functional categories, which recognized majority of the genes and categorized them into 55 functional categories (Table S2), excluding 15 uncharacterized genes (ORFs). Among these categories were stress response (*rpoE*, *lon*, *dnaJ*, *hfq*, *yaiB*), iron (*dps*, *entD*,

*iscA*, *yjeB*, *yhgI*), and transcription regulation (*rscA*, *oxyR*, *rpoE*, *yjeB*, *arcA*, *argR*, *rbsR*, *rpoS*, *fadR*, *rscB*, *furR*, *flhD*).

### **Validation of Tn-seq results using individual mutants**

For the selected 50 genes among the 137 genes identified by Tn-seq, the growth phenotype was determined using individual single deletion mutants in LB, H<sub>2</sub>O<sub>2</sub>L, and H<sub>2</sub>O<sub>2</sub>H. The genes were considered to play a role in resistance to H<sub>2</sub>O<sub>2</sub>, if (i) lag phase time increased, (ii) growth rate reduced or (iii) maximum OD<sub>600</sub> decreased in the presence of H<sub>2</sub>O<sub>2</sub> in comparison to the wild type strain grown in the same conditions. Of the 50 single deletion mutants, 42 mutants were shown to have a role in resistance to H<sub>2</sub>O<sub>2</sub> (Fig. 2 and Data Set S2). One gene, *yhaD*, was identified by all 3 analysis tools, but it did not show the expected phenotype. The *fliD* was also identified by ARTIST, but did not show any phenotype distinguishable from the wild type. The remaining 6 genes that did not show the phenotype was identified by Tn-seq Explorer. Based on the results of the individual mutant assay, we conclude that 84% (42/50) of the genes identified by the Tn-seq analysis and tested using single deletion mutants have a role for resistance to H<sub>2</sub>O<sub>2</sub>. These results indicate that our Tn-seq analysis identified the genes in *S. Typhimurium* that are required for the wild type level resistance to H<sub>2</sub>O<sub>2</sub> with high accuracy.

### **Proteomics of H<sub>2</sub>O<sub>2</sub> response**

With ESI-LC-MS/MS in data-dependent acquisition (DDA) mode, the protein regulation was determined using MS1 filtering technique that skyline software offers (33). It uses signal intensities of tryptic peptides derived from the proteins of the wild type strain grown in the presence of H<sub>2</sub>O<sub>2</sub> in comparison to the control (LB). As described in Materials and Methods section, trypsin digestion of the protein extracts under different conditions generates tryptic peptides that are uniquely related to individual proteins. Tryptic peptides separated by liquid

chromatography from the complex samples were first subjected to simple mass measurement (MS1) followed by intensity dependent fragmentation of these peptide ions to produce sequence specific fragment ions by collision-induced dissociation (MS/MS). Tryptic peptides were then identified using these sequence specific fragment ions via MASCOT database search software (34), where the sequence specific fragment ions were matched to the proteins in *S. Typhimurium* 14028S reference proteome database (24, 35). This method of protein analysis is normally referred to as data dependent analysis (DDA) method. At the beginning of data analysis, the H<sub>2</sub>O<sub>2</sub>L and H<sub>2</sub>O<sub>2</sub>H data were compared to LB separately, however it turned out that comparison was not sensitive enough to differentiate between H<sub>2</sub>O<sub>2</sub>L and H<sub>2</sub>O<sub>2</sub>H conditions. Hence, the data of H<sub>2</sub>O<sub>2</sub>L and H<sub>2</sub>O<sub>2</sub>H were combined in the analysis in comparison to LB. We identified 1,104 proteins of *Salmonella* for the 3 conditions (Data Set S3); of these, 246 proteins were differentially expressed in response to H<sub>2</sub>O<sub>2</sub> with *p* values  $\leq 0.05$  and 90% CI. The upregulated proteins were 121 and the downregulated proteins were 125 in response to H<sub>2</sub>O<sub>2</sub>. Since Tn-seq revealed genetic requirements for fitness under the selection conditions, the identified genes are expected to express their proteins under the conditions to perform their cellular functions. Often the proteins required for fitness under a given condition are overexpressed under the condition, but it may not be the case for some proteins. In this study, we had a unique opportunity to comparatively analyze both Tn-seq and the MS data to understand the relationship between genetic requirements and changes in expression level under the condition of interest, which was H<sub>2</sub>O<sub>2</sub> in this study. We also obtained the list of essential genes based on our Tn-seq data, which could not tolerate insertions by definition, and if we were not certain about essentiality of a gene from our Tn-seq data, the gene was searched for essentiality in the previously reported list of *Salmonella* essential genes (22). The comprehensive list of essential genes allowed us to study any correlation between the essentiality and the changes

in protein expression. Among the 246 proteins, there were 78 essential and 168 non-essential proteins. Among the 78 essential proteins, 25 were upregulated whereas 53 were downregulated. On the contrary, the majority ( $n = 96$ ) of the detected non-essential proteins were upregulated, while 72 non-essential proteins were downregulated. To further examine the quantitative relationships closely, 64 genes/proteins identified by both methods (Data Set S3) were focused on. Among the 64 genes/proteins, 57 genes showed negative Log2FC based on Tn-seq data, and 41 proteins among the 57 were upregulated at protein level. However, only 12 proteins had  $p$  values of  $\leq 0.05$  (AhpC, ArcA, Crr, DksA, FliC, IcdA, OxyR, Pgm, RecA, RpoS, SlpA, and WecE). Using KEGG pathway analysis, 150 proteins among the 246 were enriched in 21 pathways (Table S3). Interestingly, of the all 59 30S and 50S ribosomal proteins in *S. Typhimurium*, 37 of these proteins (63%) were downregulated in response to  $H_2O_2$ . Moreover, of the 8 identified proteins in TCA cycle, 6 proteins were downregulated, including 2 essential proteins. Although DDA method can be used to search for all proteins in a complex sample, it is prone to miss the identification of important proteins due to the fact that fragmentation of tryptic peptides from these proteins may not be triggered as a result of lower peptide ion intensities compared to the threshold set. To quantify the proteins of the genes identified by Tn-seq more precisely and accurately, we used targeted-proteomic approach by employing liquid chromatography coupled with triple quadrupole mass spectrometry (LC-QQQ-ESI-MS). Here, tryptic peptides of the protein were targeted for fragmentation (MS/MS) independent of their intensities, as described in Materials and Methods, and the observed sequence specific fragment ion intensities from three unique tryptic peptides were utilized for protein quantitation. Of the 137 Tn-seq identified genes, we selected 33 genes to quantify their proteins in response to  $H_2O_2$  by using targeted proteomics (Dataset S3). Interestingly, 23 (70%) of the 33 tested proteins were upregulated in response to

H<sub>2</sub>O<sub>2</sub>. This shows a good agreement between the results of the Tn-seq and the targeted proteomics.

### **Aromatic amino acid biosynthesis and H<sub>2</sub>O<sub>2</sub>**

Interestingly, our Tn-seq data revealed that the aromatic amino acid biosynthesis and metabolism pathway play a role in conferring resistance in *Salmonella* to H<sub>2</sub>O<sub>2</sub> (Fig. 3A and 3B). Five genes, *aroB*, *aroD*, *aroE\_2*, *aroK*, and *aroA* in the aromatic amino acid biosynthesis pathway were identified by Tn-seq, and the fitness of the mutants were significantly reduced in the presence of H<sub>2</sub>O<sub>2</sub>. To confirm this, 4 of these genes were evaluated using individual mutant assays. The *Salmonella aroK* mutant showed the strongest phenotype, because it failed to grow in the presence of H<sub>2</sub>O<sub>2</sub>L or H<sub>2</sub>O<sub>2</sub>H during 24 h incubation time. Also, the *aroB* mutant exhibited a strong phenotype, significantly extending lag phase for both H<sub>2</sub>O<sub>2</sub> conditions. The *aroE\_2* mutant also exhibited an extended lag time, but the *aroA* mutant did not show any difference in growth phenotype in the presence of H<sub>2</sub>O<sub>2</sub>. In addition, targeted-proteomics also showed that all these 5 proteins were upregulated in response to H<sub>2</sub>O<sub>2</sub>. The most upregulated protein was *aroK* and this was followed by the *aroE\_2*, *aroA*, *aroB*, and *aroD* (Fig. 3C and Data Set S3).

The ROS damages a variety of biomolecules via Fenton reaction, which consequently lead to metabolic defects, specifically auxotrophy for some aromatic amino acids (10). The *E. coli* mutants that lack superoxide dismutase enzymes are unable to grow *in vitro* unless the medium are supplemented with aromatic (Phe, Trp, Tyr), branched-chain (Ile, Leu, Val), and sulfur-containing (Cys, Met) amino acids (36). We identified the genes in the aromatic amino acid biosynthesis pathway that are critically important for resistance to H<sub>2</sub>O<sub>2</sub>. In this pathway, *aroK* catalyzes the production of shikimate 3-phosphate from shikimate, which consequently leads to the production of tryptophan, phenylalanine, tyrosine and some metabolites from the chorismate precursor in *E. coli*. Further, the *aroK* mutant in *E. coli* displays increased susceptibility to protamine, a model



cationic antimicrobial peptide. It has been suggested that resistance to protamine is probably due to the aromatic metabolites and product of *aroK* gene, which act as a signal molecule to simulate the CpxR/CpxA system and Mar regulators (37). In our Tn-seq data, *cpxR/cpxA* and *marBCRT* were in the list of non-required genes, but the proteomics data indicated that CpxR was upregulated. Also, the *aroK* mutant in *E. coli* is resistance to mecillinam, a beta-lactam antibiotic specific to penicillin-binding protein 2. It has been concluded that the AroK has a secondary activity in addition to the aromatic amino acid biosynthesis, probably related to cell division (38). In addition, the *aroK* gene presents a promising target to develop a non-toxic drug in *Mycobacterium tuberculosis* because *aroK* is the only *in vitro* essential gene among the aromatic amino acid pathway genes and blocking *aroK* kills the bacterium *in vivo* (39). Moreover, the *aroK* gene plays a general role in *S. Typhimurium* persistence in pigs (40). The *aroB* is another gene in the pathway that was identified by Tn-seq, which encodes 3-dehydroquinate synthase in the Shikimate pathway, aromatic amino acid biosynthesis pathway. The *Salmonella* lacking *aroB* showed a strong growth defect in the presence of H<sub>2</sub>O<sub>2</sub>. When this mutant was grown in the presence of H<sub>2</sub>O<sub>2</sub>, it increased the lag phase time by a 114-fold for the H<sub>2</sub>O<sub>2</sub>L and a 347-fold for the H<sub>2</sub>O<sub>2</sub>H as compared to the mutant grown in absence of H<sub>2</sub>O<sub>2</sub>. *S. Typhimurium* mutant lacking the *aroB* gene is attenuated in BALB/c mice (41). In addition to *aroK* and *aroB*, *aroE\_2* was also shown to be important for resistance to H<sub>2</sub>O<sub>2</sub>, because deletion of the *aroE\_2* reduced the growth rate by 35% in the presence of H<sub>2</sub>O<sub>2</sub> and increased the lag phase time, too. All these 3 genes in this pathway are required for systemic infection of *Salmonella* in BALB/c mice in a more recent study (18). We observed that there was a strong correlation between the fitness based on Tn-seq data, growth rates measured by individual mutant assays, and upregulation of their proteins quantified via targeted proteomics. This demonstrates the power of proteogenomic approach in discovering

and characterizing the genes that are required for growth under a specific condition.

### **The *ybbM*, *ybbK*, and *ybbL* have a role in H<sub>2</sub>O<sub>2</sub> resistance**

The mutants with single deletion in each of *ybbK*, *ybbL*, and *ybbM* genes on the same pathway showed a strong phenotype against the activity of H<sub>2</sub>O<sub>2</sub> in a dose-dependent manner. Based on Tn-seq data, the fitness of *ybbM* was -1.16 and -1.79 for H<sub>2</sub>O<sub>2</sub>L and H<sub>2</sub>O<sub>2</sub>H, respectively (Fig.4A). The *ybbM* mutant demonstrated decreased growth rate by 38% for H<sub>2</sub>O<sub>2</sub>L and 100% for the H<sub>2</sub>O<sub>2</sub>H as compared to the mutant grown in the absence of H<sub>2</sub>O<sub>2</sub>. This mutant also increased the lag time by a 126-fold and a 267-fold for H<sub>2</sub>O<sub>2</sub>L and H<sub>2</sub>O<sub>2</sub>H, respectively (Fig.4B). Also, the fitness score of *ybbK* was -0.92 for H<sub>2</sub>O<sub>2</sub>L and -1.81 for H<sub>2</sub>O<sub>2</sub>H. The *ybbK* mutant showed decrease of growth rate for both conditions H<sub>2</sub>O<sub>2</sub>L and H<sub>2</sub>O<sub>2</sub>H by 85% and 95%, respectively. The deletion increased the lag phase by a 46-fold and a 114-fold in the presence of H<sub>2</sub>O<sub>2</sub>L and H<sub>2</sub>O<sub>2</sub>H, respectively (Fig.4B). Moreover, the fitness of *ybbL* mutant was -1.05 and -1.73 for H<sub>2</sub>O<sub>2</sub>L and H<sub>2</sub>O<sub>2</sub>H, respectively. Deleting the *ybbL* in *Salmonella* led to decrease in growth rate by 27% for H<sub>2</sub>O<sub>2</sub>L and 92% for H<sub>2</sub>O<sub>2</sub>H. The lag phase time for this mutant increased by a 22-fold and a 33-fold for H<sub>2</sub>O<sub>2</sub>L and H<sub>2</sub>O<sub>2</sub>H, respectively. In addition, YbbM, YbbL, and YbbK proteins were upregulated in response to H<sub>2</sub>O<sub>2</sub>; YbbM was the most upregulated protein among the 3 proteins, followed by YbbL, and YbbK (Fig. 4C and Data Set 3). The fitness scores of the Tn-seq of these 3 genes are correlated strongly with the growth rate, lag time of their respective mutants, and upregulation of their proteins. As the number of reads depletes after the selection for a mutant, (i) there was more reduction in growth rate, (ii) the mutant stays longer in the lag phase, and (iii) the protein expression elevates. These observations clearly point to their role in conferring resistance to the H<sub>2</sub>O<sub>2</sub>-mediated stress. These genes were described in the *Salmonella* reference genome as follows: *ybbM*, putative YbbM family transport protein, metal resistance protein; *ybbK*, putative inner

membrane proteins; *ybbL*, putative ABC transporter, ATP-binding protein YbbL. To the best of our knowledge, there is only one published study on the *ybbM* and *ybbL* (42). Based on their findings, YbbL and YbbM have a role in iron homeostasis in *E. coli* and are important for survival when the bacterium was challenged with 10 mM H<sub>2</sub>O<sub>2</sub> for 30 min; this putative ABC transporter transports iron and lessens ROS species formation that generates via H<sub>2</sub>O<sub>2</sub>. In this study, we identified an additional gene, *ybbK*, in the same pathway as the gene required for resistance to H<sub>2</sub>O<sub>2</sub>, strongly establishing the role of these 3 genes in resistance to H<sub>2</sub>O<sub>2</sub>.

### **The H<sub>2</sub>O<sub>2</sub> scavenging and degrading genes**

*Salmonella* employs redundant enzymes to degrade or scavenge ROS. The *katE*, *katG*, and *katN* genes encode catalases, which are involved in H<sub>2</sub>O<sub>2</sub> degradation. The *ahpCF*, *tsaA*, and *tpx* genes encode peroxidases, which scavenge H<sub>2</sub>O<sub>2</sub>. The *sodA*, *sodB*, *sodCI*, and *sodCII* genes encode superoxide dismutases and these enzymes specifically scavenge O<sub>2</sub> (11, 12, 43 - 45). However, none of these were present in the list of genes identified by Tn-Seq. Even though *katE*, *katG*, *ahpC*, *sodA*, *sodCI*, and *sodCII* showed reduced fitness, they did not meet the statistical threshold. However, the proteomics data indicated that AhpC, SodB, and TpX were upregulated in the presence of H<sub>2</sub>O<sub>2</sub> (Data Set S3) and KatG was also upregulated, but its *p* value was 0.054. This reveals that these 4 proteins were the most important enzymes to scavenge H<sub>2</sub>O<sub>2</sub> under our experimental conditions. *Salmonella* containing an *ahpC* promoter-gfp fusion shows that expression of the *ahpC* is regulated by ROS that is generated from macrophages or exogenous H<sub>2</sub>O<sub>2</sub> and the response to H<sub>2</sub>O<sub>2</sub> is in a dose-dependent manner (46). *Salmonella* mutant that lacks *katE*, *katG*, or *ahpCF* can degrade micromolar concentrations of H<sub>2</sub>O<sub>2</sub>. However, *Salmonella* mutant that has deletions in the all 5 genes, *katE*, *katG*, *katN*, *ahpCF* and *tsaA* (HpxF), cannot degrade H<sub>2</sub>O<sub>2</sub>, is unable to proliferate in macrophages, and showed reduced virulence in mice (11).

This data emphasizes that *ahpC*, *sodB*, and *tpx* may be the primary players in scavenging and degrading H<sub>2</sub>O<sub>2</sub> in our experiment. Why Tn-seq did not detect any of these genes, while proteomics detected only these 3 proteins among others? It may reflect the functional redundancy in the genetic network that prevented single deletions in one of the these genes from exhibiting fitness defect. Alternatively, when these mutants were grown together with all other mutants in the library, the functional protein lacking in one mutant due to Tn5 insertion could have been compensated by the other mutants in the library.

In addition to these genes, *oxyR* was detected by Tn-seq (Fig. 1C) and DDA proteomics. The *oxyR* was identified by all 3 analysis methods of Tn-seq data and it was on the top of the list, indicating a severe fitness defect of the mutant. The *oxyR* gene encodes H<sub>2</sub>O<sub>2</sub> sensor and transcription factor, which mediates protection against ROS. The *katG* and *ahpCF* are regulated by OxyR, peroxide response regulator (13, 14). Although *Salmonella* OxyR regulon is induced in the *Salmonella*-containing vacuole in macrophage, the *oxyR* mutant was virulent in a BALB/c mouse and can grow well in human neutrophils *in vitro* (47, 48). The fitness of *oxyR* mutant was reduced for both H<sub>2</sub>O<sub>2</sub>L and H<sub>2</sub>O<sub>2</sub>H with the respective fitness score of -4.96 and -5.94. *Salmonella oxyR* mutant exhibited the growth rate reduced by 24% and 40% for H<sub>2</sub>O<sub>2</sub>L and H<sub>2</sub>O<sub>2</sub>H, respectively. Comparing this reduction in growth rate to the other mutants such as *rpoS* or *aroK*, we observed that the *oxyR* mutant did not show severe phenotype and the mutant escaped from the lag phase easily. Moreover, our targeted proteomics indicated that the OxyR was not upregulated significantly. Further studies are needed to uncover the exact role of OxyR in response to ROS. However, previous studies implied that OxyR plays an essential role in resistance to H<sub>2</sub>O<sub>2</sub> by regulating other proteins. OxyR induces Dps in *E. coli*, a ferritin-like protein that sequesters iron (49). Sequestering of iron impairs the Fenton reaction, which consequently provides protection against ROS and

reduces the damage of biomolecules. The *dps* gene was identified by the Tn-seq and its fitness score was -2.48. However, the Dps protein was downregulated based on the DDA proteomic analysis. To confirm this unexpected finding, we conducted the proteomic assay twice and each time with at least 4 technical replicates, but the Dps protein was significantly downregulated with  $p = 0.001$ . Further, the targeted-proteomics gave the same result, pointing to the downregulation of Dps in response to  $H_2O_2$ . This is contrary to the previously reported works on Dps in *Salmonella* and the reason for the discrepancy is unclear.

### **DNA repair system and $H_2O_2$**

The imposed exogenous  $H_2O_2$  activates DNA repair system in *Salmonella* in order to repair or eliminate the damage that occurred on the nucleotides. The *E. coli* RecA protein repairs double-strand DNA lesions through recombination (50). In our Tn-seq analysis, the fitness score of this mutant was -5.36 for both concentrations, and in proteomics, the RecA was upregulated. *Salmonella recA* mutant decreased the maximum OD<sub>600</sub> by 16% for  $H_2O_2$ L and 22% for  $H_2O_2$ H as compared to the same mutant grown in LB. The *Salmonella recA* mutant was also sensitive to exogenous  $H_2O_2$  in aerated rich medium (26). Moreover, *recG*, recombination and DNA repair gene (51), showed a stronger phenotype than *recA* mutant. The *regG* deletion in *Salmonella* caused the growth rate reduction by 52% for  $H_2O_2$ L and 60% for  $H_2O_2$ H. This disruption in *recG* also caused the cells to stay in lag phase for a longer time in the presence of  $H_2O_2$  as compared to LB; the lag time increased by a 62-fold and a 159-fold for  $H_2O_2$ L and  $H_2O_2$ H, respectively. In the blood of patients with *Salmonella* Typhi bacteremia, the proteins encoded by *recA*, *recG*, and *xthA* genes were detected, suggesting these proteins are actively expressed in the blood environment (52). The XthA protein is another enzyme that participates in DNA repair that is induced by  $H_2O_2$  and iron-mediated Fenton reaction. The *xthA* encodes exonuclease III, which repairs the damaged DNA.

We found that the *xthA* gene was required based on the Tn-seq assay and its mutant had a reduced fitness score of -3.06 for H<sub>2</sub>O<sub>2</sub>L and a -4.38 for the H<sub>2</sub>O<sub>2</sub>H. Further, *Salmonella* lacking the *xthA* increased the lag time by 8-fold and a 12-fold for H<sub>2</sub>O<sub>2</sub>L and H<sub>2</sub>O<sub>2</sub>H, respectively. Targeted-proteomics showed upregulation of XthA in response to H<sub>2</sub>O<sub>2</sub>. *Salmonella* enterica serovar Enteritidis defective in *xthA* is susceptible to egg albumin (53). *E. coli* *xthA* mutant is hypersensitive to H<sub>2</sub>O<sub>2</sub> (54). The *xthA* is also required for *Mycobacterium tuberculosis* to infect C57BL/6J mice (55). In addition to these genes that repair damaged DNA, *uvrA* encoding Holliday junction DNA helicase motor protein, *uvrA* encoding exonuclease ABC subunit A, *uvrD* encoding DNA-dependent helicase II, and *polA* encoding DNA polymerase I were among top of the list of the genes identified by Tn-seq as required for resistance to H<sub>2</sub>O<sub>2</sub>. Collectively, DNA repair system is crucial for the survival of the *Salmonella* in a niche that contains H<sub>2</sub>O<sub>2</sub>.

#### **Flageller genes and H<sub>2</sub>O<sub>2</sub>**

Some flageller genes, *fliC* and *fliB*, were shown to be important for resistance to H<sub>2</sub>O<sub>2</sub>. These two genes were identified by Tn-seq and their proteins were shown to be upregulated based on proteomics. *Salmonella* lacking either of these genes exhibited a strong phenotype in the presence of H<sub>2</sub>O<sub>2</sub>. During 24 h of incubation, *fliC* and *fliB* mutants could not grow in both H<sub>2</sub>O<sub>2</sub> conditions. However, growth of *fliD* mutant was not affected by H<sub>2</sub>O<sub>2</sub>. The *fliC* was shown to have a role in *Salmonella* Typhi interaction with human macrophages (56) and *Salmonella* Typhimurium *fliB* mutant was defective in swarming motility (57). Currently it remains unclear how flagella genes can be involved in the resistance of *Salmonella* to oxidative stress, which warrants future study into this direction.

#### **Fe-S cluster biogenesis system and H<sub>2</sub>O<sub>2</sub>**

*Salmonella* requires the genes from Fe-S cluster biogenesis system in order to resist H<sub>2</sub>O<sub>2</sub>. Our

Tn-seq analysis identified 5 genes in this system as required for the resistance. In *isc* operon (Fe-S cluster), *iscA*, *hscB*, and *hscA* were among the genes required to resist H<sub>2</sub>O<sub>2</sub>. Particularly, the *hscA* is on the top of the gene list identified by Tn-seq. In *E. coli*, this operon is regulated by *iscR*, iron sulfur cluster regulator (58); in *Salmonella* the gene *iscR* encoding this transcription regulator is named *yfhP*. The HscB and HscA chaperones are believed to be involved in the maturation of [2Fe-2S] proteins (59, 60). The second operon that is involved in Fe-S protein biogenesis is the *suf*, sulfur mobilization operon. Tn-seq found that two genes in this operon were required for *Salmonella* to resist H<sub>2</sub>O<sub>2</sub>; *sufS* and *sufC*. *Salmonella* mutant lacking *sufS* exhibited a strong phenotype in the presence of H<sub>2</sub>O<sub>2</sub> and could not grow during the 24 h of incubation as compared to LB. The SufS with SufE in *E. coli* form a heterodimeric cysteine desulphurase and SufB, SufC, and SufD form a pseudo-ABC-transporter that could act as a scaffold (60); this operon is regulated by OxyR (14). The other known genes in these two operons that are present in *Salmonella* are *iscA*, *sufA*, *sufB*, and *sufD*; they showed a reduced fitness, while their *p* values were greater than 0.05. The damage of Fe-S clusters is not only problem for the defective proteins, but also it fuels the Fenton reaction via the released iron and H<sub>2</sub>O<sub>2</sub> (10). Thus, *Salmonella* uses Fe-S cluster repair system as an arsenal to overcome the damage imposed by H<sub>2</sub>O<sub>2</sub>.

## **DNA adenine methylase**

DNA adenine methylase genes, *dam* and *damX*, are involved in *Salmonella* resistance against H<sub>2</sub>O<sub>2</sub>. Our Tn-seq data showed that fitness of *dam* and *damX* mutants were reduced in the presence of H<sub>2</sub>O<sub>2</sub>. To confirm this, *Salmonella dam* mutant was grown in both conditions. Under H<sub>2</sub>O<sub>2</sub>L, the growth rate was reduced by 42% as compared to the mutant in LB and the mutant could not grow under H<sub>2</sub>O<sub>2</sub>H during the 24 h of incubation. In addition, the lag time of the *Salmonella dam* mutant was extended by a 19-fold for H<sub>2</sub>O<sub>2</sub>L. While the *Salmonella damX* mutant displayed a



moderate phenotype as compared to the *dam* mutant, the *damX* mutant also showed the growth rate decreased by 23% and 33% for H<sub>2</sub>O<sub>2</sub>L and H<sub>2</sub>O<sub>2</sub>H, respectively. The lag time was extended for this mutant by a 25-fold and a 49-fold for H<sub>2</sub>O<sub>2</sub>L and H<sub>2</sub>O<sub>2</sub>H, respectively. The *dam* regulates virulence gene expression in *S. Typhimurium* (61). The different levels of Dam affects virulence gene expression, motility, flagellar synthesis, and bile resistance in the pathogenic *S. Typhimurium* 14028S (62). Dam methylation activates the gene that are involved in lipopolysaccharide synthesis (63). Moreover, *Salmonella* defective in *damX* is very sensitive to bile (64). Collectively, our study demonstrates the critical role of DNA adenine methylase in *Salmonella* resistance against H<sub>2</sub>O<sub>2</sub>.

### **Other genes for H<sub>2</sub>O<sub>2</sub> resistance**

Beside the important pathways described above, there were many additional genes also important for resistance to H<sub>2</sub>O<sub>2</sub>. Among those, the 3 unrelated genes, *rpoS*, *pgm*, and *tonB*, are important ones that deserve more attention. The *rpoS* mutant showed reduced fitness and its protein was upregulated in the presence of H<sub>2</sub>O<sub>2</sub>. *Salmonella* mutant defective in *rpoS* showed a strong phenotype when grown in the presence of H<sub>2</sub>O<sub>2</sub>. The *rpoS* encodes the alternative sigma factor  $\sigma^S$ , subunit of RNA polymerase; it is the master regulator of stress response (65). This implies that *rpoS* is an important component of the genetic regulatory network that *Salmonella* employs in order to resist H<sub>2</sub>O<sub>2</sub>. Furthermore, the fitness of *pgm* mutant was reduced and its protein was upregulated in the presence of H<sub>2</sub>O<sub>2</sub>. Knock out of *pgm* in *Salmonella* caused a decrease in growth rate, increase the lag phase time, and reduce the maximum OD<sub>600</sub> in the presence of H<sub>2</sub>O<sub>2</sub>. The *pgm* encodes phosphoglucomutase required for catalysis of the interconversion of glucose 1-phosphate and glucose 6-phosphate (66). This gene contributes to resistance against antimicrobial peptides, is required for *in vivo* fitness in the mouse model, and participates in LPS biosynthesis (67). Lastly, the fitness of *tonB* mutant was also reduced. *Salmonella* lacking *tonB* exhibited a



strong phenotype in the presence of H<sub>2</sub>O<sub>2</sub> as compared to the mutant grown in LB. The gene mediates iron uptake in the *Salmonella* (45). In addition, seven of the genes identified in our study (*proC*, *arcA*, *barA*, *exbD*, *flhD*, *fliC*, and *fliD*) were previously shown to be important for interaction of *Salmonella* Typhi with human macrophages (56). To see the full list of *S.* Typhimurium genes required for H<sub>2</sub>O<sub>2</sub> resistance, the supplementary information contains data of Tn-seq, individual mutant assays, and proteomic analysis in Data Set S1, S2, and S3, respectively.

## Conclusions

We applied Tn-seq and proteomic analysis to find the genes and proteins that are required in *S.* Typhimurium to resist H<sub>2</sub>O<sub>2</sub> *in vitro*. As the concentration of H<sub>2</sub>O<sub>2</sub> increased, the growth rate reduced, the lag time extended, the fitness of mutants decreased, and some proteins were differentially expressed. Validation of Tn-seq results with individual mutant assays indicated the accuracy of the identified genes in response to the two H<sub>2</sub>O<sub>2</sub> concentrations. The targeted-proteomics had a good agreement with Tn-seq. We found about 80 genes that have not been associated to resistance to H<sub>2</sub>O<sub>2</sub> previously. *Salmonella* employs multiple pathways to resist H<sub>2</sub>O<sub>2</sub> and the most important ones are ROS detoxifying enzymes, amino acid biosynthesis (*aroK* and *aroB*), putative iron transporters (*ybbK*, *ybbL*, *ybbM*), iron homeostasis, Fe-S cluster repair, DNA repair, flagellar and DNA adenine methylase genes. The genes identified in this study will broaden our understanding on the mechanisms used by *Salmonella* to survive and persist against ROS in macrophages.

Our unbiased system-wide approach, Tn-seq, was successful in identifying novel genetic determinants that have not been implicated previously in *Salmonella* resistance to oxidative stress. Furthermore, the combined use of quantitative proteomic approach has provided additional

insights on the function or mode of action of the identified genetic determinants in resisting oxidative stress. As expected, the majority of the proteins important for resistance to H<sub>2</sub>O<sub>2</sub> were upregulated in response to the same stressor. However, the expression level did not increase for some proteins, in spite of their known roles in resistance to H<sub>2</sub>O<sub>2</sub>. Interestingly, the downregulation of Dps and other proteins was counterintuitive to the common mode of protein regulation and function, yet it may point to some unknown aspects of how *Salmonella* regulates the expression of those proteins to better cope with the oxidative stress during infection in macrophage.

## Materials and Methods

### Construction of Tn5 mutant library

We mutagenized *Salmonella enterica* subsp. *enterica* serovar Typhimurium str. ATCC 14028S (with spontaneous mutation conferring resistance to nalidixic acid (NA)), by biparental mating using *Escherichia coli* SM10  $\lambda$ pir carrying a transposon-delivery plasmid vector pBAM1 (Ampicillin (Amp) resistance) as a donor strain (68). The plasmid pBAM1 was generously provided by Victor de Lorenzo (Systems and Synthetic Biology Program, Centro Nacional de Biotecnología, Madrid, Spain). The donor strain, *E. coli* Sm10  $\lambda$ pir (pBAM1), was grown overnight in LB with 50  $\mu$ g/ml Amp and recipient strain was grown in LB with 50  $\mu$ g/ml NA at 37 °C. Equal volumes (1 ml) of donor and recipient were mixed, centrifuged, washed in 10 mM MgSO<sub>4</sub>, and re-suspended in 2 ml PBS (pH 7.4). Then, the mating mixture was concentrated and laid on a 0.45- $\mu$ m nitrocellulose filters (Millipore). The filter was incubated at 37°C on the surface of LB agar plate. After 5 h of conjugation, the cells on the filter was washed in 10 mM MgSO<sub>4</sub>, and resuspended in 1 ml MgSO<sub>4</sub>. The conjugation mixture was plated on LB agar containing 50  $\mu$ g/ml NA and 50  $\mu$ g/ml kanamycin (Km). After approximately 24 h at 37°C, we scraped the

colonies into LB broth containing 50 µg/ml Km and 7% DMSO. The yield was approximately 68,000 individual colonies from each conjugation. Five independent conjugations were conducted to yield approximately 325,000 mutants. The library was stored at –80°C in aliquots. To determine the frequency of the mutants that have been produced by integration of the entire delivery plasmid, the colonies were picked randomly and streaked on LB plates (Km) and LB plates (Km and Amp). It was shown that ~20% of the cells in the library were resistant to Amp, indicating a significant portion of the Km-resistant colonies was not from authentic transposition events.

### **Measuring growth responses of *S. Typhimurium* to H<sub>2</sub>O<sub>2</sub>**

To determine the effect of H<sub>2</sub>O<sub>2</sub> concentrations on growth parameters, overnight culture of the wild type *S. Typhimurium* 14028s was inoculated into fresh LB broth media (1:200 dilution) to give a seeding concentration corresponding to OD<sub>600</sub> of ~0.1. The LB broth contained freshly prepared H<sub>2</sub>O<sub>2</sub> to give the final concentrations ranging from 0.05 to 10 mM. The cultures were directly added into 96-well microplate (200 µl/well). The microplate was incubated in a Tecan Infinite 200 microplate reader at 37°C, with shaking duration 5 s, shaking amplitude 1.5 mm, and reading OD<sub>600</sub> every 10 min. The number of replicates were at least three. The lag time, growth rate, and maximum OD<sub>600</sub> were calculated using GrowthRates script (69). Growth Rate % decrease was calculated as follows (70): Growth Rate % decrease =  $((\mu_{PC} - \mu_S)/\mu_{PC}) \times 100$ ; where  $\mu$  = the maximum slope (growth rate),  $\mu_{PC}$  = growth rate of positive control (without H<sub>2</sub>O<sub>2</sub>),  $\mu_S$  = growth rate in the presence of H<sub>2</sub>O<sub>2</sub>.

### **Selection of the mutant library for Tn-seq analysis**

The transposon library was thawed at room temperature and diluted 10<sup>-1</sup> in fresh LB broth. To activate the library, the diluted library was incubated at 37°C with shaking at 225 rpm for an hour. Then, the culture was washed twice with PBS and resuspended in LB broth medium. The library

was inoculated to 20 ml LB broth and LB broth supplemented with either 2.5 or 3.5 mM H<sub>2</sub>O<sub>2</sub> (H<sub>2</sub>O<sub>2</sub>L and H<sub>2</sub>O<sub>2</sub>H, respectively), seeding CFU was 3.5 x 10<sup>6</sup> per ml. Then, when the cultures reached mid-exponential phase, OD<sub>600</sub> of 2.7 (~1.17 x 10<sup>8</sup> CFU/ml), the incubation was stopped, and the culture was immediately harvested by centrifugation, and stored at -20°C.

### **Preparation of Tn-seq amplicon libraries**

Genomic DNA was extracted from the harvested cells using DNeasy Blood & Tissue kit (Qiagen), and quantified using Qubit dsDNA RB Assay kit (Invitrogen). As described above, 20% of the mutants in the library were the result of the integration of pBAM1 into chromosome. To remove the Tn5-junction sequences originated from the plasmid in the Tn-seq amplicon libraries, genomic DNA was digested with PvuII-HF (New England Biolabs), which digests immediately outside the inverted repeats on both sides of Tn5 in pBAM1, and purified with DNA Clean & Concentrator-5 kit (Zymo Research). Then, a linear PCR extension was performed using a Tn5-specific primer in order to produce single stranded DNA corresponding to Tn5-junction sequences. To increase the specificity in extending into Tn5-junction sequences, the linear PCR was conducted with a dual priming oligonucleotide Tn5-DPO (5'-AAGCTTGCATGCCTGCAGGTIIIICTAGAGGATC-3') that is specific to Tn5 end (71). The PCR reaction contained 25 µl Go Taq Colorless Master Mix (Promega), 20 µM Tn5-DPO primer, 100 ng gDNA, and 50 µl MQ-H<sub>2</sub>O. The PCR cycle consisted of the initial denaturation at 95°C for 2 min, followed by 50 cycles at 95°C for 30 sec, 62°C for 45 sec, and 72°C for 10 sec. The PCR product was purified with DNA Clean & Concentrator-5 kit and eluted in 13 µl TE buffer. After that, C-tail was added to the 3' end of the single-stranded DNA. The C-tailing reaction was consisted of 2 µl terminal transferase (TdT) buffer (New England Biolabs), 2 µl CoCl<sub>2</sub>, 2.4 µl 10 mM dCTP, 1 µl 1 mM ddCTP, 0.5 µl TdT and 13 µl purified linear PCR product. The reaction was performed at 37°C for 1 h and the enzyme was inactivated by

incubation at 70°C for 10 min. The C-tailed product was purified with DNA Clean & Concentrator-5 kit and eluted in 12 µl TE. Next, the exponential PCR was performed with forward primer, P5-BRX-TN5-MEO, AATGATACGGCGACCACCGAGATCTACACTCTTTCCCTACACGACGCTCTTCCGATC TNNNNAG-6 nt barcode-CCTAGGCGGCCTTAATTAAAGATGTGTATAAGAG and reverse primer, P7-16G, CAAGCAGAAGACGGCATACGAGCTCTTCCGATCTGGGGGGGGGGGGGGGGGGGG to attach Illumina adapter sequences along with the sample barcodes. The PCR reaction contained 25 µl Go Taq Green Master Mix, 10 µM P5-BRX-TN5-MEO primer, 10 µM P7-16G primer, 1 µl purified C-tailed genomic junctions, and MQ-H<sub>2</sub>O to 50 µl; the PCR condition started with initial denaturation at 95°C for 2 min, followed by 36 cycles of 95°C for 30 sec, 60°C for 30 sec, and 72°C for 20 sec, with the final extension at 72°C for 5 min. Then, the size selection of the DNA was performed using agarose gel electrophoresis. The 50 µl PCR products were incubated at 60°C for 15 min and incubated on ice for 5 min, and immediately loaded on the 1% agarose gel in 0.5% TAE buffer. After running the gel, the DNA fragment of size 325 – 625 bp was cut and put in a microtube for each sample. The DNA was extracted from the gel using Zymoclean Gel DNA Recovery kit (Zymo Reaerch). The prepared DNA libraries were quantified using Qubit dsDNA RB Assay kit. Since each library has its own barcode, the libraries were combined and sequenced on a flow cell of HiSeq 3000 using single end read and 151 cycles (Illumina) at the Center for Genome Research & Biocomputing in Oregon State University.

# **Tn-seq data analysis**

The preliminary data analysis was conducted by using a super computer in the High Performance Computing Center (AHPCC) at the University of Arkansas. The libraries that were multiplexed

for sequencing were de-multiplexed using a custom Python script. The script searched for the six-nucleotide barcode for each library for perfect matches. In order to extract the transposon genomic junctions, we used Tn-Seq Pre-Processor (TPP) tool (30) with some modifications in the script. The TPP searched for the 19 nucleotide inverted repeat (IR) sequence and identified five nucleotides (GACAG) at the end of the IR sequence, allowing one nucleotide mismatch. The Tn5-junctions that start immediately after GACAG were extracted and the C-tails at the end of junctions were removed. Tn5-junction sequences less than 20 nucleotides were discarded and remaining Tn5-junctions were mapped to the *Salmonella enterica* serovar Typhimurium 14028S genome and plasmid using BWA-0.7.12 (72). To identify genes that are required for H<sub>2</sub>O<sub>2</sub> resistance, the following three Tn-seq analysis tools were used for comparative analysis: (i) ARTIST (28): the genomic junctions were mapped to the reference genome using Bowtie 2.2.7 (73). The number of insertions and reads were determined for genes and intergenic regions. The data were normalized with default script in the ARTIST. Then, the relative abundance of Tn5 insertions in the output library versus the input were calculated. Later, the *p* values were calculated from a 100 independent Mann–Whitney U test (MWU) analysis that were carried out on input and output data for each gene. Finally, the genes were considered conditionally essential if the *p* values were  $\leq 0.05$  in the 90 of the 100 MWU tests. (ii) Tn-seq Explorer (29): The output SAM files from the TPP were used as input to the Tn-seq Explorer. The unique insertions with less than 20 reads were removed from the input and outputs. Using the window size of 550 and excluding 5% of beginning of genes and 20% of the end of genes, Essentiality Index (EI), number of unique insertions, and total number of reads per gene were counted. The EI of more than 10 were removed from the input. Genes with less than 300 nucleotides were removed. Differential EI were calculated from input and outputs ( $\Delta\text{IE} = \text{output EI} - \text{input EI}$ ) and genes with  $\Delta\text{IE}$  more than -1 were removed. Log<sub>2</sub> fold change of

reads were calculated from input and output ( $\text{Log2FC} = \log_2 (\text{output reads}/\text{input reads})$ ) and the genes were ranked based on the Log2FC value from least value to highest. The genes with Log2FC value of less than -2 from the H<sub>2</sub>O<sub>2</sub>H and present in H<sub>2</sub>O<sub>2</sub>L were considered conditionally essential. (iii) TRANSIT (30): The output wig files from the TTP was used as input data file for TRANSIT. The comparative analysis was conducted with Tn5 resampling option. The reads were normalized with trimmed total reads (TTR). Insertions outside the 5% and 10% sequences from 5'- and 3'- ends were removed, respectively. The genes were considered conditionally essential if  $p$  values  $\leq$  0.05.

### **Phenotypic evaluation of individual deletion mutants**

The mutants were obtained from *Salmonella enterica* subsp. *enterica*, 14028s (Serovar Typhimurium) Single-Gene Deletion Mutant Library through BEI Resources ([www.beiresources.org](http://www.beiresources.org)). The overnight cultures of *S. Typhimurium* mutants were added into fresh LB broth media containing freshly prepared H<sub>2</sub>O<sub>2</sub> (2.5, or 3.5 mM/ml) (1:200 dilution) to give seeding OD<sub>600</sub> of 0.1. The cultures were directly added into 96-well microplates and incubated in Tecan Infinite 200 at 37°C for 24 h. The lag time, growth rate, and maximum OD<sub>600</sub> were calculated using GrowthRates (69).

### **Sample preparation for proteomics and mass spectrometry analysis**

The overnight culture of the wild type *S. Typhimurium* 14028 was diluted 1:200 in 50 ml LB medium, and LB containing either 2.5 or 3.5 mM H<sub>2</sub>O<sub>2</sub> in a 300-ml flask. The cultures were grown until mid-exponential phase (OD<sub>600</sub> of 2.7), and the 50 ml volume of cultures were used for a total protein extraction by using Qproteome Bacterial Protein Prep kit (Qiagen). The proteins were denatured with mercaptoethanol and separated by SDS-PAGE gel electrophoresis. For each condition, there were three lanes with approximately 300 µg of proteins. The gel portions of 3



lanes for each condition were cut out and chopped into small pieces, pooled together, washed twice with 50 mM  $\text{NH}_4\text{HCO}_3$ , destained with  $\text{NH}_4\text{HCO}_3$ / 50% Acetonitrile (ACN), and dried with pure ACN. Then, the proteins were reduced using 10 mM Dithiothreitol in 50 mM  $\text{NH}_4\text{CO}_3$  and the alkylation was conducted with 10 mg/ml Iodoacetamide Acid in 50 mM  $\text{NH}_4\text{CO}_3$ . After that, the proteins were washed with  $\text{NH}_4\text{HCO}_3$ , and dried with pure ACN. Mass spectrometry grade Trypsin gold from Promega (~20 ng/ $\mu\text{l}$  in 50 mM  $\text{NH}_4\text{HCO}_3$ ) was added to dried gels, and left it overnight for efficient in-gel digestion of the proteins at 37°C. During the digestion, tryptic peptides diffused out into the solution. Later, these digests were analyzed by ESI-LC-MS/MS at State Wide Mass Spectrometry Facility, University of Arkansas at Fayetteville. Data dependent analysis (DDA) for the in-gel trypsin digested samples from each condition were performed by using an Agilent 1200 series micro flow HPLC in line with Bruker Amazon-SL quadrupole ion trap ESI mass spectrometer (QIT-ESI-MS). All the ESI-MS analyses were performed in a positive ion mode using Bruker captive electrospray source with a dry nitrogen gas temperature of 200°C, with nitrogen flow rate of 3 L/minute. LC-MS/MS data were acquired in the Auto MS(n) mode with optimized trapping condition for the ions at  $m/z$  1000. MS scans were performed in the enhanced scanning mode (8100  $m/z$ /second), while the collision-induced dissociation or the MS/MS fragmentation scans were performed automatically for top ten precursor ions with a set threshold for one minute in the UltraScan mode (32,500  $m/z$ /second). Tryptic peptides were separated by reverse-phase high-performance liquid chromatography (RP-HPLC) using a Zorbax SB C18 column, (150  $\times$  0.3 mm, 3.5  $\mu\text{m}$  particle size, 300 Å pore size, Agilent Technologies), with a solvent flow rate of 4  $\mu\text{L}$ /minute, and a gradient of 5%–38% consisting of 0.1% FA (solvent A) and ACN (solvent B) over a time period of 320 minutes. Tryptic peptides were then identified by searching MS/MS data in *S. Typhimurium* 14028S reference proteome database (24, 35) by using



MASCOT database search software (34). MS1 intensities of the integrated areas of these identified tryptic peptides were compiled and grouped in skyline software according to the replicates/conditions to perform statistical analysis. Targeted protein work were performed using Shimadzu UPLC-20A coupled to 8050 triple quadrupole ESI-MS with heated probe. Sequence specific fragment ion intensities from at least three unique tryptic peptides from the protein of interest were used in the protein quantitation. Multiple reaction monitoring (MRM) events corresponding to sequence specific fragment ions derived from the precursor tryptic peptides were targeted to operate at a certain specific retention time intervals predicted by in house retention time library. This library was generated using the correlation of relative hydrophobicity of the tryptic peptides with their retention times (RT) from highly common housekeeping proteins, for the UPLC method used in this analysis as described below. While the RT were correlated well within 99% confidence, sufficient number of sequence specific fragment ions were used as basis for identification of the tryptic peptide by MS/MS alone. Specificity and the confidence was achieved by incorporating RT prediction. In addition to the application of skyline in quantitation, skyline software was also used in predicting RT and optimizing parameters such as collision energies and voltages with the help of Shimadzu Labsolution software. Tryptic peptides were separated by reverse-phase ultra-high-performance liquid chromatography (RP-UPLC) compatible Shimadzu C18, 1.9-micron particle size, 50x2.1 mm column (SN # 16041880T), with a solvent flow rate of 0.3 mL/minute, and a gradient of 5%–90% consisting of 0.1% FA (solvent A) and 0.1% FA in ACN (solvent B) over a time period of 10 minutes.

# **Accession numbers**

Tn-seq sequencing data are available on NCBI Sequence Read Archive. LB: PRJNA352537; H<sub>2</sub>O<sub>2</sub>L: PRJNA352862; H<sub>2</sub>O<sub>2</sub>H: PRJNA352865.

## **Funding**

The bench fee of this work was came from a fund from Arkansas Biosciences Institute. The first author was supported by his parents, Cell and Molecular Biology (CEMB) program at the University of Arkansas, and Human Capacity Development Program-Kurdistan Regional Government (HCDP-KRG).

## **Acknowledgment**

We thank Jack Jiang, a high school student, for writing the demultiplexing Python script. We are thankful for Dr. Thomas R. Ioerger and Dr. Michael A. DeJesus at Texas A&M University for the help on the use of TRNASIT. We extend our special thanks to Dr. Jeff F. Pummill and Dr. Pawel Wolinski at Arkansas High Performance Computing Center for their help to use the facility.

## **Author Contributions**

Conceived and designed the experiments: YK SK. Performed the experiments, analyzed the data, wrote the manuscript: SK. Proteomics work: RL SK AQ JL. Revised the manuscript: YK SK. All authors read the final version of the manuscript.

## **Supplementary Information**

### **Data Set S1**

Full list of *Salmonella* Tn-seq genome for H<sub>2</sub>O<sub>2</sub>L and H<sub>2</sub>O<sub>2</sub>H analyzed by ARTIST, Tn-Seq Explorer, and ARTIST. The list of 137 *Salmonella* genes for H<sub>2</sub>O<sub>2</sub> resistance.

### **Data Set S2**

Lag time, growth rate, and maximum OD<sub>600</sub> of *Salmonella* grown in LB, H<sub>2</sub>O<sub>2</sub>L, H<sub>2</sub>O<sub>2</sub>H.

### **Data Set S3**

*Salmonella* proteomic analysis in response to the H<sub>2</sub>O<sub>2</sub>, non-targeted and targeted proteomics.

## Table S1

*Salmonella* Tn-seq sequencing in numbers for LB, H<sub>2</sub>O<sub>2</sub>L, and H<sub>2</sub>O<sub>2</sub>H

## Table S2

List of functional categories required for *Salmonella* H<sub>2</sub>O<sub>2</sub> resistance.

## Table S3

List of differentially expressed proteins of *Salmonella* in response to H<sub>2</sub>O<sub>2</sub> and their pathways.

## Fig S1

Stability of H<sub>2</sub>O<sub>2</sub> in the medium and during the experiment time.

## Fig S2

Tn-seq library preparation diagram for Illumina sequencing.

## Fig S3

Correlation between reads of *Salmonella* Tn-seq conditions, H<sub>2</sub>O<sub>2</sub>L and H<sub>2</sub>O<sub>2</sub>H.

## REFERENCES

1. **LaRock DL, Chaudhary A, Miller SI.** 2015. Salmonellae interactions with host processes. Nat Rev Microbiol **13**:191-205.
2. **Scallan E, Hoekstra RM, Angulo FJ, Tauxe RV, Widdowson MA, Roy SL, Jones JL, Griffin PM.** 2011. Foodborne illness acquired in the United States – major pathogens. Emerg Infect Dis **17**:1-15.
3. **Majowicz SE, Musto J, Scallan E, Angulo FJ, Kirk M, O'Brien SJ, Jones TF, Fazil A, Hoekstra RM.** 2010. The global burden of nontyphoidal *Salmonella* gastroenteritis. Clin Infect Dis **50**:882-889.

- 805 4. **Haraga A, Ohlson MB, Miller SI.** 2008. Salmonellae interplay with host cells. *Nat Rev*  
806 *Microbiol* **6**:53-66.
- 807 5. **Nauseef W.** 2004. Assembly of the phagocyte NADPH oxidase. *Histochem Cell Biol*  
808 **122**:277-291.
- 809 6. **Seaver LC, Imlay JA.** 2001. Hydrogen peroxide fluxes and compartmentalization inside  
810 growing *Escherichia coli*. *J Bacteriol* **183**:7182-7189.
- 811 7. **Park S, You X, Imlay JA.** 2005. Substantial DNA damage from submicromolar  
812 intracellular hydrogen peroxide detected in Hpx- mutants of *Escherichia coli*. *Proc Natl*  
813 *Acad Sci U S A* **102**:9317-9322.
- 814 8. **Imlay JA, Linn S.** 1988. DNA damage and oxygen radical toxicity. *Science* **240**:1302-  
815 1309.
- 816 9. **Imlay JA.** 2006. Iron-sulphur clusters and the problem with oxygen. *Mol Microbiol*  
817 **59**:1073-1082.
- 818 10. **Slauch JM.** 2011. How does the oxidative burst of macrophages kill bacteria? Still an open  
819 question. *Mol Microbiol* **80**:580-583.
- 820 11. **Hébrard M, Julie P. M. Viala, Méresse S, Barras F, Aussel L.** 2009. Redundant  
821 Hydrogen Peroxide Scavengers Contribute to *Salmonella* Virulence and Oxidative Stress  
822 Resistance. *J Bacteriol* **191**:4605-4614.
- 823 12. **Horst SA, Jaeger T, Denkel LA, Rouf SF, Rhen M, Bange F.** 2010. Thiol peroxidase  
824 protects *Salmonella enterica* from hydrogen peroxide stress *in vitro* and facilitates  
825 intracellular growth. *J Bacteriol* **192**:2929-2932.
- 826 13. **Morgan RW, Christman MF, Jacobson FS, Storz G, Ames BN.** 1986. Hydrogen  
827 Peroxide-Inducible Proteins in *Salmonella typhimurium* Overlap with Heat Shock and

- Other Stress Proteins. Proc Natl Acad Sci U S A **83**:8059-8063.
14. **Zheng M, Wang X, Templeton LJ, Smulski DR, LaRossa RA, Storz G.** 2001. DNA microarray-mediated transcriptional profiling of the *Escherichia coli* response to hydrogen peroxide. J Bacteriol **183**:4562-4570.
15. **Kroger C, Colgan A, Srikumar S, Handler K, Sivasankaran S, Hammarlof D, Canals R, Grissom J, Conway T, Hokamp K, Hinton J.** 2013. An infection-relevant transcriptomic compendium for *Salmonella enterica* Serovar Typhimurium. Cell Host Microbe **14**:683-695.
16. **Turner KH, Wessel AK, Palmer GC, Murray JL, Whiteley M.** 2015. Essential genome of *Pseudomonas aeruginosa* in cystic fibrosis sputum. Proc Natl Acad Sci U S A **112**:4110-4115.
17. **Chan K, Kim CC, Falkow S.** 2005. Microarray-based detection of *Salmonella enterica* Serovar Typhimurium transposon mutants that cannot survive in macrophages and mice. Infect Immun **73**:5438-5449.
18. **Silva-Valenzuela C, Molina-Quiroz R, Desai P, Valenzuela C, Porwollik S, Zhao M, Hoffman R, Andrews-Polymenis H, Contreras I, Santiviago C, McClelland M.** 2016. Analysis of two complementary single-gene deletion mutant libraries of *Salmonella* Typhimurium in intraperitoneal infection of BALB/c Mice. Front Microbiol **6**:1455.
19. **van Opijnen T, Bodi KL, Camilli A.** 2009. Tn-seq: high-throughput parallel sequencing for fitness and genetic interaction studies in microorganisms. Nat Methods **6**:767-772.
20. **Khatiwara A, Jiang T, Sung S, Dawoud T, Kim JN, Bhattacharya D, Kim H, Ricke SC, Kwon YM.** 2012. Genome scanning for conditionally essential genes in *Salmonella enterica* Serotype Typhimurium. Appl Environ Microbiol **78**:3098-3107.

21. **Chaudhuri R, Morgan E, Peters S, Pleasance S, Hudson D, Davies H, Wang J, van Diemen P, Buckley A, Bowen A, Pullinger G, Turner D, Langridge G, Turner A, Parkhill J, Charles I, Maskell D, Stevens M.** 2013. Comprehensive assignment of roles for *Salmonella* Typhimurium genes in intestinal colonization of food-producing animals. PLoS Genet **9**:e1003456.
22. **Langridge GC, Phan M, Turner DJ, Perkins TT, Parts L, Haase J, Charles I, Maskell DJ, Peters SE, Dougan G, Wain J, Parkhill J, Turner AK.** 2009. Simultaneous assay of every *Salmonella* Typhi gene using one million transposon mutants. Genome Res **19**:2308-2316.
23. **Barquist L, Langridge GC, Turner DJ, Phan M, Turner AK, Bateman A, Parkhill J, Wain J, Gardner PP.** 2013. A comparison of dense transposon insertion libraries in the *Salmonella* serovars Typhi and Typhimurium. Nucleic Acids Res **41**:4549-4564.
24. **Domon B, Aebersold R.** 2010. Options and considerations when selecting a quantitative proteomics strategy. Nat Biotechnol **28**:710-721.
25. **Jensen ON, Mann M.** 2003. Proteomic analysis of post-translational modifications. Nat Biotechnol **21**:255-261.
26. **Bogomolnaya L, Andrews K, Talamantes M, Maple A, Ragoza Y, Vazquez-Torres A, Andrews-Polymenis H.** 2013. The ABC-Type efflux pump MacAB protects *Salmonella enterica* serovar Typhimurium from oxidative stress. Mbio **4**:e00630.
27. **Kwon YM, Ricke SC, Mandal RK.** 2016. Transposon sequencing: methods and expanding applications. Appl Microbiol Biotechnol **100**:31-43.
28. **Pritchard JR, Chao MC, Abel S, Davis BM, Baranowski C, Zhang YJ, Rubin EJ, Waldor MK.** 2014. ARTIST: high-resolution genome-wide assessment of fitness using

transposon-insertion sequencing. PLoS Genet **10**:e1004782-e1004782.

29. **Solaimanpour S, Sarmiento F, Mrazek J.** 2015. Tn-Seq Explorer: A tool for analysis of high-throughput sequencing data of transposon mutant libraries. Plos One **10**:e0126070.
30. **DeJesus MA, Ambadipudi C, Baker R, Sassetti C, Ioerger TR.** 2015. TRANSIT--A software tool for Himar1 TnSeq analysis. PLoS Comput Biol **11**:e1004401-e1004401.
31. **Huang DW, Sherman BT, Lempicki RA.** 2009. Bioinformatics enrichment tools: paths toward the comprehensive functional analysis of large gene lists. Nucleic Acids Res **37**:1-13.
32. **Kanehisa M, Goto S.** 2000. KEGG: Kyoto Encyclopedia of genes and genomes. Nucleic Acids Res **28**:27-30.
33. **MacLean B, Tomazela D, Shulman N, Chambers M, Finney G, Frewen B, Kern R, Tabb D, Liebler D, MacCoss M.** 2010. Skyline: an open source document editor for creating and analyzing targeted proteomics experiments. Bioinformatics **26**:966-968.
34. **Perkins D, Pappin D, Creasy D, Cottrell J.** 1999. Probability-based protein identification by searching sequence databases using mass spectrometry data. Electrophoresis **20**:3551-3567.
35. **Cravatt BF, Yates III JR, Simon GM.** 2007. The biological impact of mass-spectrometry-based proteomics. Nature **450**:991-1000.
36. **Carliz A, Touati D.** 1986. Isolation of superoxide dismutase mutants in *Escherichia coli*: is superoxide dismutase necessary for aerobic life? Embo j **5**:623-630.
37. **Weatherspoon-Griffin N, Yang D, Kong W, Hua Z, Shi Y.** 2014. The CpxR/CpxA Two-component Regulatory System Up-regulates the Multidrug Resistance Cascade to Facilitate *Escherichia coli* Resistance to a Model Antimicrobial Peptide. J Biol Chem

897           **289**:32571-32582.

898    38.    **Vinella D, Gagny B, Joseleau-Petit D, D'Ari R, Cashel M.** 1996. Mecillinam resistance  
899           in *Escherichia coli* is conferred by loss of a second activity of the AroK protein. J Bacteriol  
900           **178**:3818-3828.

901    39.    **Kaur P, Datta S, Shandil RK, Kumar N, Robert N, Sokhi UK, Guptha S, Narayanan**  
902           **S, Anbarasu A, Ramaiah S.** 2016. Unravelling the secrets of mycobacterial cidality  
903           through the lens of antisense. PLoS One **11**:e0154513.

904    40.    **Van Parys A, Boyen F, Leyman B, Verbrugghe E, Haesebrouck F, Pasmans F.** 2011.  
905           Tissue-specific *Salmonella* Typhimurium gene expression during persistence in Pigs. Plos  
906           One **6**:e24120.

907    41.    **Günel-Özcan A, Brown KA, Allen AG, Maskell DJ.** 1997. *Salmonella* typhimurium  
908           aroB mutants are attenuated in BALB/ c mice. Microb Pathog **23**:311-316.

909    42.    **Nicolaou SA, Fast AG, Nakamaru-Ogiso E, Papoutsakis ET.** 2013. Overexpression of  
910           fetA (ybbL) and fetB (ybbM), encoding an Iron exporter, enhances resistance to oxidative  
911           stress in *Escherichia coli*. Appl Environ Microbiol **79**:7210-7219.

912    43.    **Robbe-Saule V, Coynault C, Ibanez-Ruiz M, Hermant D, Norel F.** 2001. Identification  
913           of a non-haem catalase in *Salmonella* and its regulation by RpoS ( $\sigma$ S). Mol Microbiol  
914           **39**:1533-1545.

915    44.    **Craig M, Slauch J.** 2009. Phagocytic superoxide specifically damages an  
916           extracytoplasmic target to inhibit or kill *Salmonella*. Plos One **4**:e4975.

917    45.    **Tsolis RM, Bäumler AJ, Heffron F, Stojiljkovic I.** 1996. Contribution of TonB- and Feo-  
918           mediated iron uptake to growth of *Salmonella* typhimurium in the mouse. Infect Immun  
919           **64**:4549-4556.



- 920 46. **Aussel L, Zhao W, Hebrard M, Guilhon AA, Viala JPM, Henri S, Chasson L, Gorvel**  
921 **JP, Barras F, Meresse S.** 2011. *Salmonella* detoxifying enzymes are sufficient to cope  
922 with the host oxidative burst. *Mol Microbiol* **80**:628-640.
- 923 47. **Taylor PD, Inchley CJ, Gallagher MP.** 1998. The *Salmonella* typhimurium AhpC  
924 polypeptide is not essential for virulence in BALB/c Mice but is recognized as an antigen  
925 during infection. *Infect Immun* **66**:3208-3217.
- 926 48. **Papp-Szabò E, Firtel M, Josephy PD.** 1994. Comparison of the sensitivities of  
927 *Salmonella* typhimurium oxyR and katG mutants to killing by human neutrophils. *Infect*  
928 *Immun* **62**:2662-2668.
- 929 49. **Imlay J.** 2015. Diagnosing oxidative stress in bacteria: not as easy as you might think. *Curr*  
930 *Opin Microbiol* **24**:124-131.
- 931 50. **Carlsson J, Carpenter VS.** 1980. The recA<sup>+</sup> gene product is more important than catalase  
932 and superoxide dismutase in protecting *Escherichia coli* against hydrogen peroxide  
933 toxicity. *J Bacteriol* **142**:319-321.
- 934 51. **Ishioka K, Iwasaki H, Shinagawa H.** 1997. Roles of the recG gene product of *Escherichia*  
935 *coli* in recombination repair: Effects of the Delta recG mutation on cell division and  
936 chromosome partition. *Genes Genet Syst* **72**:91-99.
- 937 52. **Sheikh A, Charles R, Sharmeen N, Rollins S, Harris J, Bhuiyan M, Arifuzzaman M,**  
938 **Khanam F, Bukka A, Kalsy A, Porwollik S, Leung D, Brooks W, LaRocque R,**  
939 **Hohmann E, Cravioto A, Logvinenko T, Calderwood S, McClelland M, Graham J,**  
940 **Qadri F, Ryan E.** 2011. In Vivo Expression of *Salmonella enterica* Serotype Typhi Genes  
941 in the Blood of Patients with Typhoid Fever in Bangladesh. *PLoS Negl Trop Dis* **5**:e1419.
- 942 53. **Lu S, Killoran PB, Riley LW.** 2003. Association of *Salmonella enterica* Serovar

- Enteritidis YafD with resistance to chicken egg albumen. Infect Immun **71**:6734-6741.
54. **Demple B, Halbrook J, Linn S.** 1983. *Escherichia coli* xth mutants are hypersensitive to hydrogen peroxide. J Bacteriol **153**:1079-1082.
55. **Sassetti CM, Rubin EJ.** 2003. Genetic requirements for mycobacterial survival during infection. Proc Natl Acad Sci U S A **100**:12989-12994.
56. **Sabbagh S, Lepage C, McClelland M, Daigle F.** 2012. Selection of *Salmonella enterica* Serovar Typhi genes involved during interaction with human macrophages by screening of a transposon mutant library. Plos One **7**:e36643.
57. **Bogomolnaya L, Aldrich L, Ragoza Y, Talamantes M, Andrews K, McClelland M, Andrews-Polymenis H.** 2014. Identification of novel factors involved in modulating motility of *Salmonella enterica* Serotype Typhimurium. Plos One **9**:e111513.
58. **Schwartz CJ, Giel JL, Patschkowski T, Luther C, Ruzicka FJ, Beinert H, Kiley PJ.** 2001. IscR, An Fe-S cluster-containing transcription factor, represses expression of *Escherichia coli* genes encoding Fe-S cluster assembly proteins. Proc Natl Acad Sci U S A **98**:14895-14900.
59. **Unciuleac M, Chandramouli K, Naik S, Mayer S, Huynh B, Johnson M, Dean D.** 2007. Vitro activation of apo-aconitase using a [4Fe-4S] cluster-loaded form of the IscU [Fe-S] cluster scaffolding protein. Biochemistry **46**:6812-6821.
60. **Py B, Barras F.** 2010. Building Fe-S proteins: bacterial strategies. Nat Rev Microbiol **8**:436-446.
61. **Balbontín R, Rowley G, Pucciarelli MG, López-Garrido J, Wormstone Y, Lucchini S, Portillo FG, Jay C. D. Hinton, Casadesús J.** 2006. DNA adenine methylation regulates virulence gene expression in *Salmonella enterica* Serovar Typhimurium. J Bacteriol

**188:**8160-8168.

62. **Badie G, Heithoff DM, Sinsheimer RL, Mahan MJ.** 2007. Altered levels of *Salmonella* DNA adenine methylase are associated with defects in gene expression, motility, flagellar synthesis, and bile resistance in the pathogenic strain 14028 but not in the laboratory strain LT2. *J Bacteriol* **189:**1556-1564.
63. **Sarnacki SH, Marolda CL, Llana MN, Giacomodonato MN, Valvano MA, Cerquetti MC.** 2009. Dam methylation controls O-antigen chain length in *Salmonella enterica* Serovar Enteritidis by regulating the expression of Wzz protein. *J Bacteriol* **191:**6694-6700.
64. **Lopez-Garrido J, Cheng N, Garcia-Quintanilla F, Garcia-del Portillo F, Casadesus J.** 2010. Identification of the *Salmonella enterica* damX gene product, an inner membrane protein involved in bile resistance. *J Bacteriol* **192:**893-895.
65. **Hengge-Aronis R.** 2002. Signal transduction and regulatory mechanisms involved in control of the  $\sigma$ S (RpoS) subunit of RNA polymerase. *Microbiol Mol Biol Rev* **66:**373-395.
66. **Lu M, Kleckner N.** 1994. Molecular cloning and characterization of the pgm gene encoding phosphoglucomutase of *Escherichia coli*. *J Bacteriol* **176:**5847-5851.
67. **Paterson GK, Cone DB, Peters SE, Maskell DJ.** 2009. The enzyme phosphoglucomutase (Pgm) is required by *Salmonella enterica* serovar Typhimurium for O-antigen production, resistance to antimicrobial peptides and in vivo fitness. *Microbiology* **155:**3403-3410.
68. **Martínez-García E, Calles B, Arévalo-Rodríguez M, de Lorenzo V.** 2011. pBAM1: an all-synthetic genetic tool for analysis and construction of complex bacterial phenotypes. *BMC Microbiol* **11:**38-38.

69. **Hall B, Acar H, Nandipati A, Barlow M.** 2014. Growth rates made easy. *Mol Biol Evol* **31**:232-238.
70. **Yao Q, Luo Z, Yuan X, Yu Y, Zhang C, Xie J, Lee JY.** 2014. Assembly of nanoions via electrostatic interactions: ion-like behavior of charged noble metal nanoclusters. *Sci Rep* **4**:3848-3848.
71. **Chun J, Kim K, Hwang I, Kim Y, Lee D, Lee I, Kim J.** 2007. Dual priming oligonucleotide system for the multiplex detection of respiratory viruses and SNP genotyping of CYP2C19 gene. *Nucleic Acids Res* **35**:e40-e40.
72. **Li H, Durbin R.** 2009. Fast and accurate short read alignment with Burrows-Wheeler transform. *Bioinformatics* **25**:1754-1760.
73. **Langmead B, Trapnell C, Pop M, Salzberg S.** 2009. Ultrafast and memory-efficient alignment of short DNA sequences to the human genome. *Genome Biol* **10**:R25-R25.

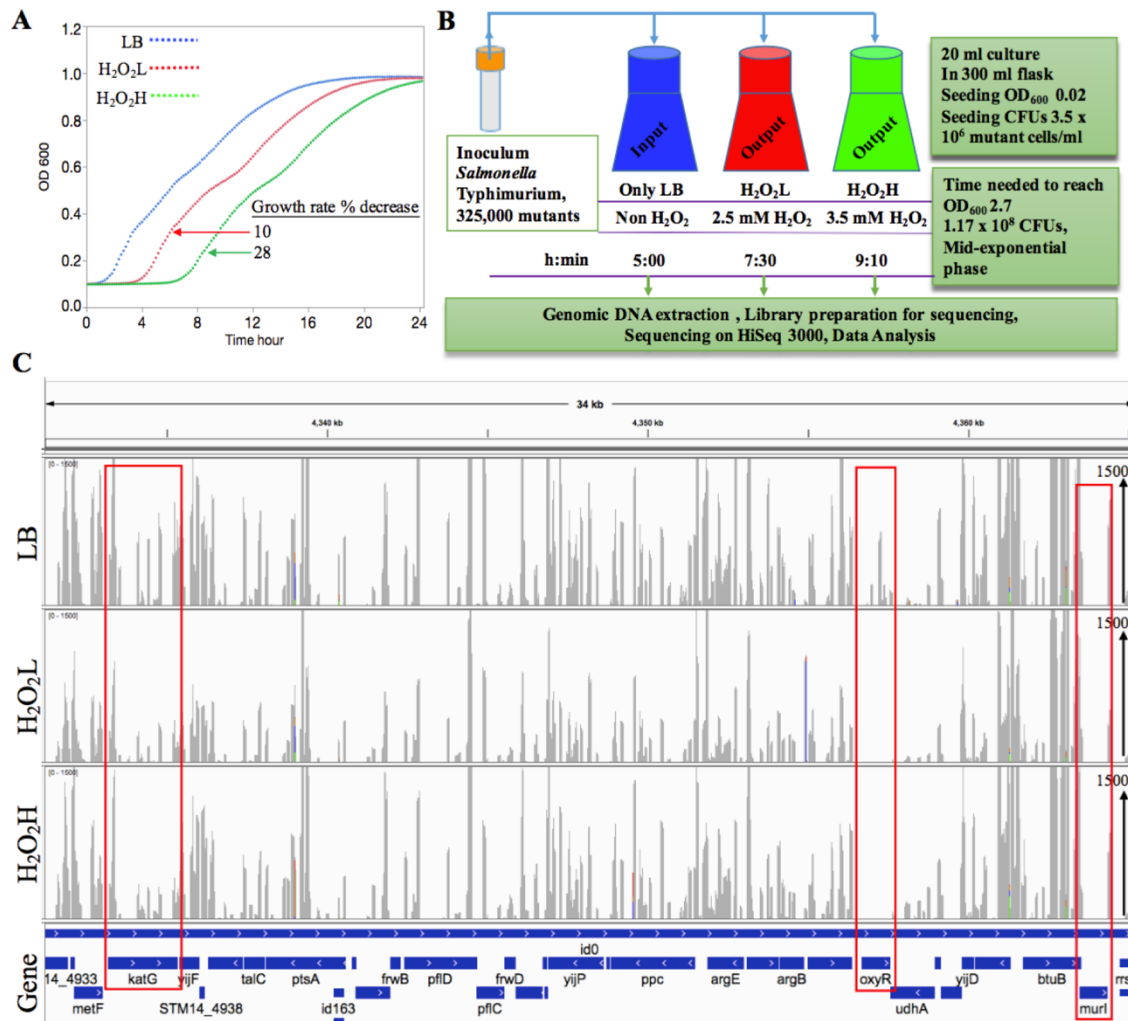

FIG 1

The Tn-seq can identify the genes that are required H<sub>2</sub>O<sub>2</sub> resistance. (A) The effect of H<sub>2</sub>O<sub>2</sub> on the

growth rate of wild type *Salmonella* Typhimurium. An overnight culture of bacteria was diluted 1:200 in the LB medium contains either 2.5 mM H<sub>2</sub>O<sub>2</sub> (H<sub>2</sub>O<sub>2</sub>L) or 3.5 mM H<sub>2</sub>O<sub>2</sub> (H<sub>2</sub>O<sub>2</sub>H), LB without H<sub>2</sub>O<sub>2</sub> was used as control. The cultures were incubated at 37°C for 24 h in a 96-well plate. The reduced growth rates for the H<sub>2</sub>O<sub>2</sub> were in comparison to the control. In the all growth curve figures in this work, the blue color represents just LB (no H<sub>2</sub>O<sub>2</sub>), the red is H<sub>2</sub>O<sub>2</sub>L, and green is H<sub>2</sub>O<sub>2</sub>H. (B) Schematic representation of the Tn-seq study. The *Salmonella* transposon mutant library was inoculated into LB and LB contains H<sub>2</sub>O<sub>2</sub>L or H<sub>2</sub>O<sub>2</sub>H. The three cultures were grown until they reached mid-exponential phase. The DNA was extracted from each culture and subjected to library preparation, sequencing, and data analysis. (C) The Tn-seq profile of the three conditions. It shows 34 kb of the *Salmonella* genome which starts with *metF* gene and ends with *rrsB*, horizontal axis. The height of vertical axis represents number of reads which is 1500 reads. The highlighted genes in red are *katG*, catalase peroxidase, was tolerated insertions in the both H<sub>2</sub>O<sub>2</sub> conditions; *oxyR* was not tolerated insertions in presence of H<sub>2</sub>O<sub>2</sub> and indicated that the gene is required to H<sub>2</sub>O<sub>2</sub> resistance; *murI*, glutamate racemase, was not tolerated any insertions at all and considered as essential gene, its required for the biosynthesis of a component of cell wall peptidoglycan.

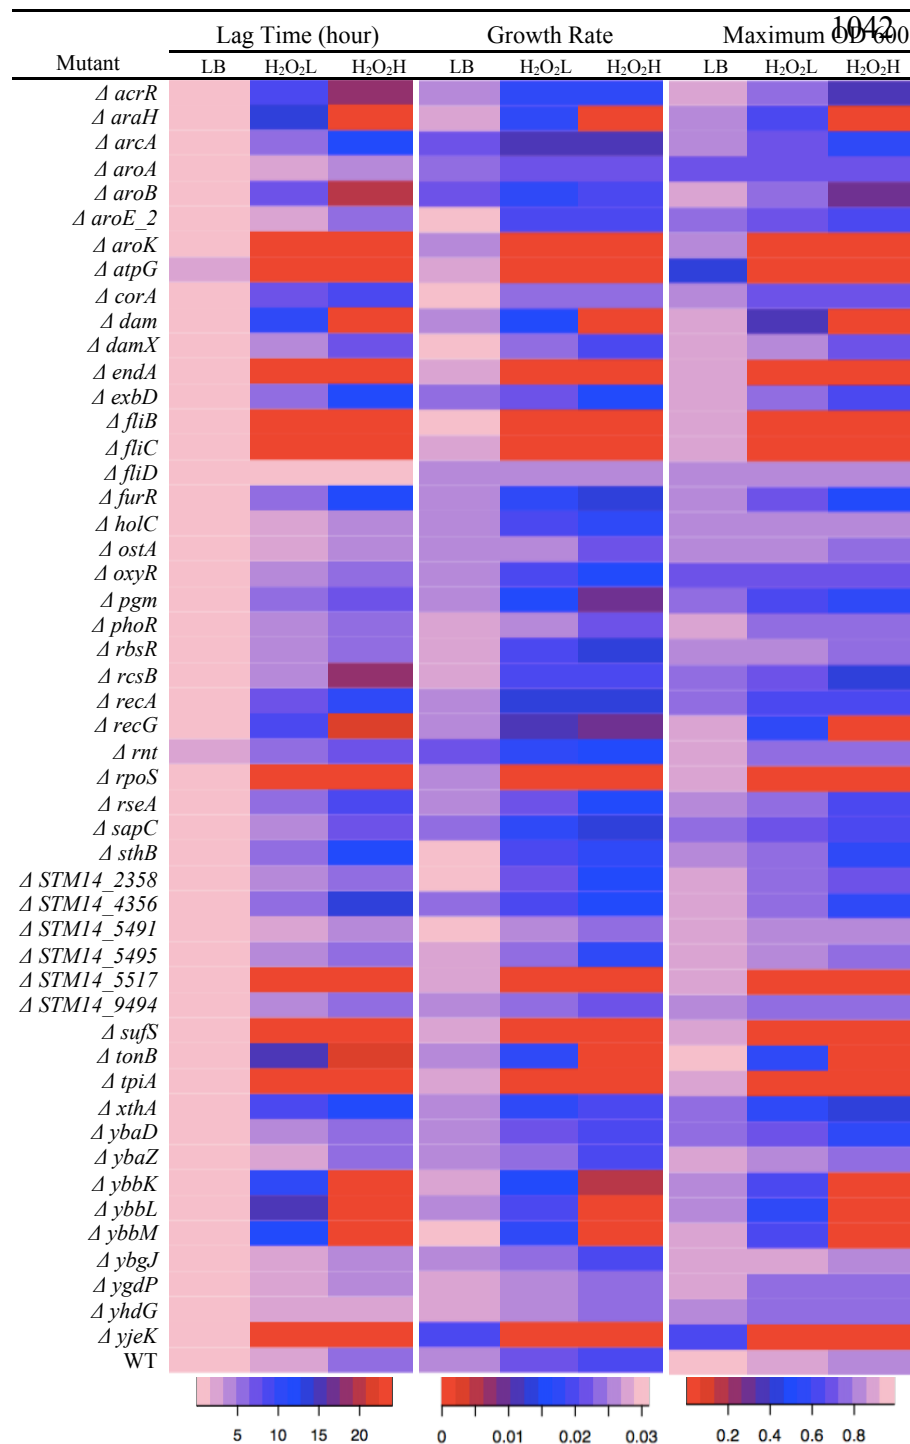

1062 FIG 2

1063 Growth curve of 50 mutants and a wild type *Salmonella* in the form of heat map. The lag phase  
1064 time, growth rate, and maximum OD<sub>600</sub> of the individual *Salmonella* Typhimurium mutants and

the wild type in the growth conditions of LB (no H<sub>2</sub>O<sub>2</sub>), H<sub>2</sub>O<sub>2</sub>L and H<sub>2</sub>O<sub>2</sub>H. The overnight culture of the mutants and the wild type bacteria were diluted 1:200 in the LB medium, and the LB contains either 2.5 mM H<sub>2</sub>O<sub>2</sub> (H<sub>2</sub>O<sub>2</sub>L) or 3.5 mM H<sub>2</sub>O<sub>2</sub> (H<sub>2</sub>O<sub>2</sub>H). The cultures were incubated at 37°C for 24 h in 96-well plate and the OD<sub>600</sub> was recorded every 10 min. The lag phase time, growth rate and maximum OD<sub>600</sub> were calculated and shown here as a graphical representation. The pale pink color indicates short lag phase time, high growth rate, and high OD<sub>600</sub>. The red color indicates that the bacteria was stayed in lag phase, growth rate was close to zero, and the OD<sub>600</sub> of the culture was not raised in the 24 h time of the assays.



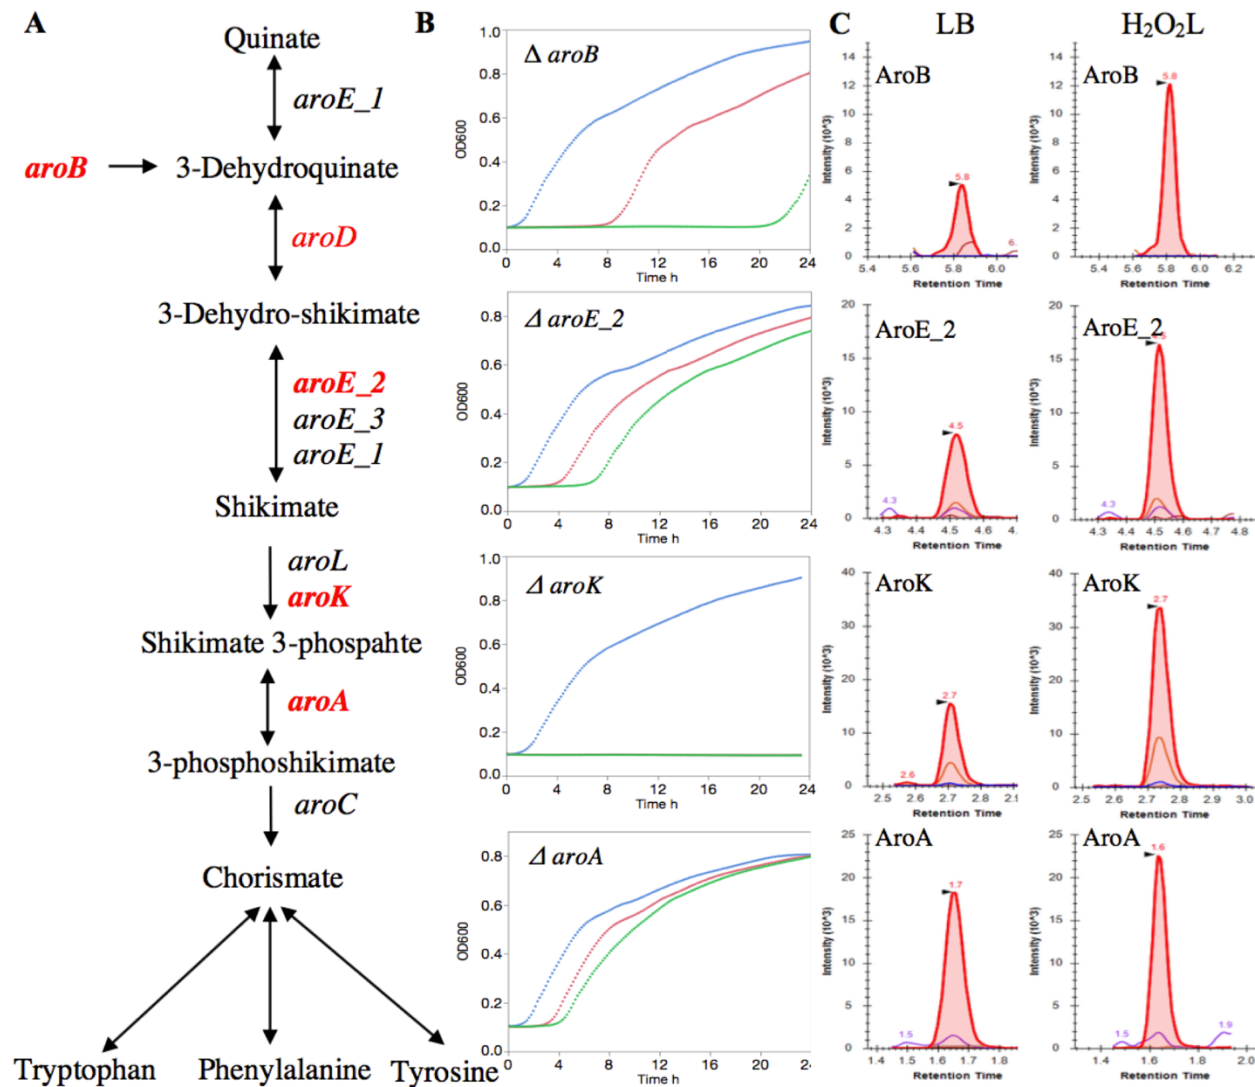

FIG 3

The role of aromatic amino acid biosynthesis genes in resistance to the  $H_2O_2$ . (A) Schematic representation of aromatic amino acid biosynthesis, adapted from the KEGG pathway database. The genes in red color were identified by the Tn-seq for  $H_2O_2$  resistance in *Salmonella*. The red bold color genes were identified by the Tn-seq and the phenotypes were validated by the individual mutant assays. (B) The overnight cultures of the individual mutants were diluted 1:200 in the LB (no  $H_2O_2$ ) and the LB contains either 2.5 mM  $H_2O_2$  ( $H_2O_2L$ ) or 3.5 mM  $H_2O_2$  ( $H_2O_2H$ ). The

cultures were incubated at 37°C for 24 h in 96-well plate. The color of growth curve figures is blue for the LB, red is H<sub>2</sub>O<sub>2</sub>L, and green is H<sub>2</sub>O<sub>2</sub>H. In the  $\Delta$  *aroK* growth curve, the red color is under the green color. (C) Differential expression of *Salmonella* proteins in response to the H<sub>2</sub>O<sub>2</sub>L compared to the LB. Wild type *Salmonella* was grown in LB, H<sub>2</sub>O<sub>2</sub>L, and H<sub>2</sub>O<sub>2</sub>H until mid-exponential phase. Targeted-proteomics was quantified AroB, AroE\_2, AroK, and AroA protein expressions in response to H<sub>2</sub>O<sub>2</sub>L. The shown peaks represent a unique peptide of the protein.

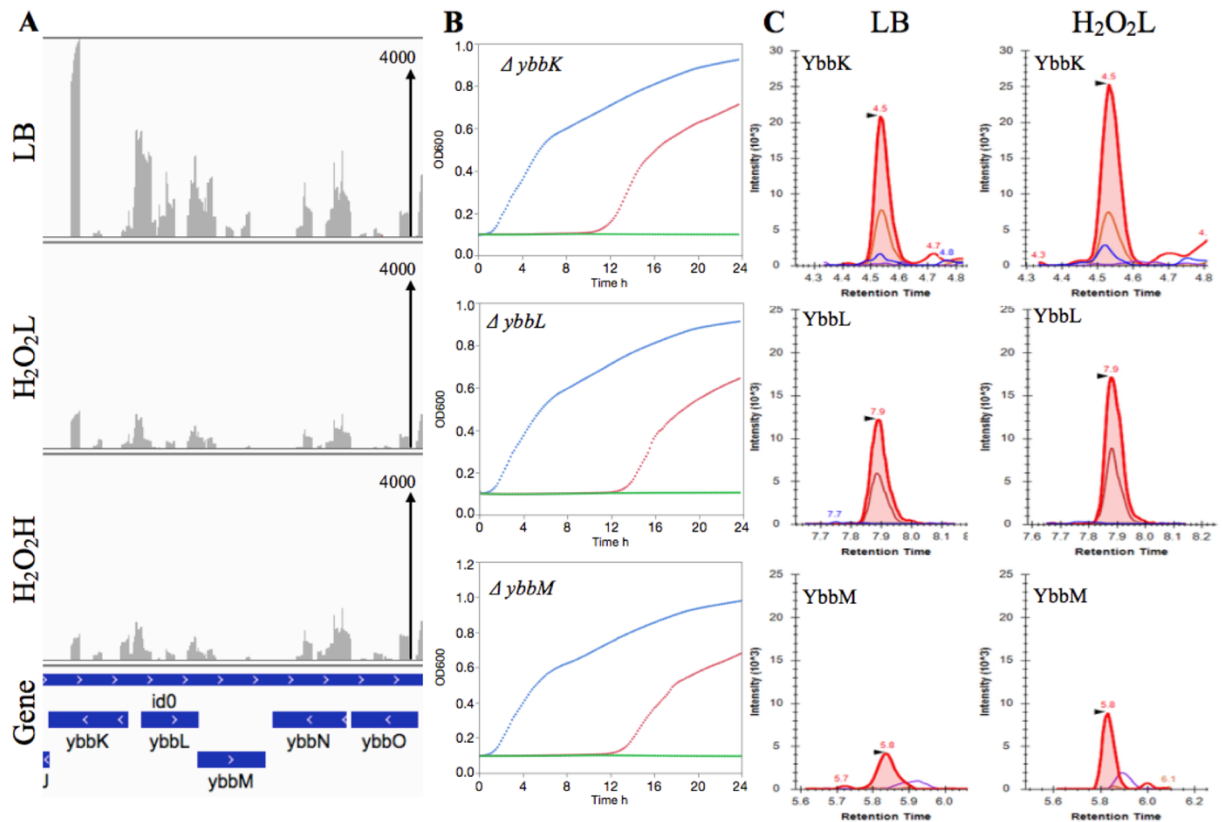

FIG 4

The *ybbK*, *ybbL*, and *ybbM* have a role in resistance to H<sub>2</sub>O<sub>2</sub>. (A) The Tn-seq profile of the LB (no H<sub>2</sub>O<sub>2</sub>), H<sub>2</sub>O<sub>2</sub>L (2.5 mM), and H<sub>2</sub>O<sub>2</sub>H (3.5 mM). It shows ~6 kb of *Salmonella* Typhimurium genome starts with *ybbK* and ends with *ybbO*, horizontal axis. The read scale for the conditions are 4000, vertical axis. (B) The growth curve of  $\Delta ybbK$ ,  $\Delta ybbL$ , and  $\Delta ybbM$ . The overnight cultures of these three mutants were diluted 1:200 in LB, H<sub>2</sub>O<sub>2</sub>L, and H<sub>2</sub>O<sub>2</sub>H. The cultures were incubated at 37°C for 24 h in 96-well plate. The growth curve colors are blue which represents just LB or no H<sub>2</sub>O<sub>2</sub>, the red is H<sub>2</sub>O<sub>2</sub>L, and green is H<sub>2</sub>O<sub>2</sub>H. (C) Wild type *Salmonella* was grown in LB, H<sub>2</sub>O<sub>2</sub>L, and H<sub>2</sub>O<sub>2</sub>H until mid-exponential phase. Targeted-proteomics was quantified YbbK, YbbL, and YbbM protein expressions in response to H<sub>2</sub>O<sub>2</sub>L. The shown peaks represent a unique peptide of the protein.
